1 Exploring the associations between skeletal muscle echogenicity and  
2 physical function in aging adults: A systematic review with meta-analyses

3  
4 \*Dustin J Oranchuk<sup>1</sup>, Stephan G Bodkin<sup>1,2</sup>, Katie L Boncella<sup>1</sup>, Michael O Harris-Love<sup>1</sup>

5  
6 1. Muscle Morphology, Mechanics, and Performance Laboratory, Department of Physical  
7 Medicine and Rehabilitation, University of Colorado Anschutz Medical Campus, Aurora,  
8 CO, United States

9 2. Department of Physical Therapy and Athletic Training, University of Utah, Salt Lake City,  
10 UT, United States

11

12 **\*Corresponding author:**

13 Dustin J Oranchuk

14 +1-303-886-4056

15 Denver, Colorado, United States of America

16

17 **Tables:** 1

18 **Figures:** 7

19 **Word count:** 4102

20 **Funding disclosure:** None

21 **Conflict of interest:** None

22

23

24 **Abstract**

25 **Background:** Assessment and quantification of skeletal muscle within the aging population is vital  
26 for diagnosis, treatment, and injury/disease prevention. The clinical availability of assessing  
27 muscle quality through diagnostic ultrasound presents an opportunity to be utilized as a screening  
28 tool for function-limiting diseases. However, relationships between muscle echogenicity and  
29 clinical functional assessments require authoritative analysis. Thus, we aimed to 1) synthesize the  
30 literature to assess the relationships between skeletal muscle echogenicity and physical function  
31 in older ( $\geq 60$  years) adults, 2) perform pooled analyses of relationships between skeletal muscle  
32 echogenicity and physical function, and 3) perform sub-analyses to determine between-muscle  
33 relationships.

34 **Methods:** CINAHL, Embase, MEDLINE, PubMed, and Web of Science databases were  
35 systematically searched to identify articles relating skeletal muscle echogenicity to physical  
36 function in older adults. Meta-analyses with and without sub-analysis for individual muscles were  
37 performed utilizing Fisher's Z transformation for the most common measures of physical function.  
38 Fisher's Z was back-transformed to Pearson's  $r$  for interpretation.

39 **Results:** Fifty-one articles (N=5095, female= $\sim 2759$ , male= $\sim 2301$ ,  $72.5 \pm 5.8$  years [one study did  
40 not provide sex descriptors]) were extracted for review, with previously unpublished data obtained  
41 from the authors of 12 studies. The rectus femoris (n=32) and isometric knee extension strength  
42 (n=22) were the most accessed muscle and physical qualities, respectively. The relationship  
43 between quadriceps echogenicity and knee extensor strength was moderate (n=2924,  $r=-0.36$   
44 [95%CI: -0.38 to -0.32],  $p < 0.001$ ), with all other meta-analyses (grip strength, walking speed, sit-  
45 to-stand, timed up-and-go) resulting in slightly weaker correlations ( $r=-0.34$  to  $-0.23$ , all  $p < 0.001$ ).  
46 Sub-analyses determined minimal differences in predictive ability between muscle groups,

47 although combining muscles (e.g., rectus femoris+vastus lateralis) often resulted in stronger  
48 correlations with maximal strength.

49 **Conclusions:** While correlations were modest, the affordable, portable, and noninvasive ultrasonic  
50 assessment of muscle quality was a consistent predictor of physical function in older adults.  
51 Minimal between-muscle differences suggest that echogenicity estimates of muscle quality are  
52 systemic. Therefore, practitioners may be able to scan a single muscle to assess full-body skeletal  
53 muscle quality/composition, while researchers should consider combining multiple muscles to  
54 strengthen the model.

55 **Registration:** The original protocol was prospectively registered at the National Institute of Health  
56 Research PROSPERO (CRD42020201841).

57

58 **Highlights:**

- 59 • Relationships between skeletal muscle echogenicity and physical function were small to  
60 moderate, but highly consistent.
- 61 • Sub-analyses determined minimal between-muscle differences in predictive ability.
- 62 • Ultrasonic echogenicity should be considered part of early detection screens for sarcopenia  
63 and other diseases.
- 64 • Combining muscles tended to strengthen the model, although muscle quality appears  
65 systemic, allowing for a single scan to represent the total body.

66

67 **Keywords:** correlations, echo intensity, elderly, intramuscular fat, muscle health, musculoskeletal,  
68 strength

69

## 70 **1. Introduction**

71           Assessment and quantification of skeletal muscle morphology and function within the  
72 aging population is vital for diagnosis, treatment, and injury/disease prevention. Sarcopenia,  
73 defined as the reduction in muscle mass and strength,<sup>1</sup> is a growing concern, with up to 25% of  
74 individuals over 70 years receiving the diagnosis.<sup>2</sup> Early identification of the decline in skeletal  
75 muscle morphology and function can lead to appropriate therapies, such as exercise or nutritional  
76 interventions, that may improve patient outcomes.<sup>3</sup> To date, screening measures to identify patients  
77 at risk for sarcopenic-related disability include patient-reported outcomes (such as the SARC-F),  
78 objective measurement of grip or strength, and functional tasks such as the chair stand or 6-meter  
79 walk tests.<sup>1,4</sup> In addition to the size and strength of skeletal muscle, recent literature has proposed  
80 the addition of skeletal muscle quality due to its relationship with patient outcomes and clinical  
81 accessibility.<sup>5,6</sup>

82  
83           Muscle quality provides information on the morphology of the muscle, such as adipogenic,  
84 fibrotic, or contractile tissue.<sup>7</sup> Literature has demonstrated increases in quadriceps intramuscular  
85 adipose and fibrous tissue with concurrent skeletal muscle atrophy with age, suggesting the  
86 potential replacement of contractile tissue.<sup>8</sup> Fibrotic activity increases within aging muscle, which  
87 inhibits the ability to repair and regenerate.<sup>9</sup> Clinical decisions made dependent solely on muscle  
88 size may fail to consider morphological characteristics of the muscle that impair physical function.

89  
90           Changes in skeletal muscle morphology are traditionally assessed through invasive  
91 laboratory techniques – specifically by obtaining skeletal muscle biopsy to quantify the fibrotic or  
92 adipogenic tissue.<sup>10</sup> Clinically accessible techniques to quantify intramuscular adipose tissue can

93 be obtained through MRI and CT imaging. Though common, these techniques are time-  
94 consuming, cost-restrictive, and expose patients to radiation (CT scans). Diagnostic ultrasound  
95 quantifies muscle quality through echogenicity,<sup>7</sup> which is defined as the pixel intensity of an  
96 image. Assessed through brightness mode (B-mode) ultrasound, the greyscale value (range: 0-255  
97 arbitrary units [AU]) represents the “quality” of the muscle, with a higher number representing a  
98 greater distribution of lighter pixels. A brighter pixel (higher greyscale value) represents lighter  
99 tissue, such as intramuscular adipocytes and fibrous tissue,<sup>11</sup> while lower greyscale values have  
100 been related to greater lean body mass (e.g., contractile tissue, water).<sup>11</sup>

101  
102 The clinical availability of assessing echogenicity also presents an opportunity to be  
103 utilized as a screening tool for function-limiting diseases including sarcopenia, cachexia, and  
104 muscular dystrophy. Lower muscle quality assessed through echogenicity has been associated with  
105 lower measures of muscle strength.<sup>12</sup> However, results are not uniform within the aging population  
106 as assessments and techniques to quantify muscle function are inconsistent. Compiling research  
107 findings on the functional associates of echogenicity can further progress the clinical utility of  
108 ultrasound with aging individuals.

109  
110 Early detection of muscle loss and strength is vital for early clinical diagnosis and  
111 treatment. Intramuscular adiposity has been shown to precede and accelerate the onset of  
112 sarcopenic functional impairments.<sup>13</sup> As such, accessible clinical tools like diagnostic ultrasound  
113 may play an essential role in assessing muscle size and quality to predict loss of function. To date,  
114 relationships between muscle echogenicity and clinical and functional assessments are unclear due  
115 to the large variability in scanning location and assessment procedures. Therefore, the purpose of

116 this systematic review was to 1) qualitatively synthesize the literature assessing the relationships  
117 between skeletal muscle echogenicity and physical function in older adults, 2) perform a  
118 quantitative pooled analyses of relevant correlations where possible, and 3) examine between-  
119 muscle relationships to determine differences in predictive ability.

120

## 121 **2. Methods**

### 122 *2.1. Registration of systematic review protocol*

123 A systematic literature review was performed according to the guidelines in the Cochrane  
124 Handbook for Systematic Reviews of Interventions (version 6.0) and following the 2020 checklist  
125 for the Preferred Reporting Items for Systematic Reviews and Meta-Analyses. The original  
126 protocol was prospectively registered at the National Institute of Health Research PROSPERO  
127 (CRD42020201841).

128

### 129 *2.2. Eligibility criteria*

130 Studies evaluating the relationship of ultrasound echogenicity to assessments of skeletal  
131 muscle function were included. All studies had to include an older population ( $\geq 60$  years),  
132 quantified skeletal muscle echogenicity through diagnostic ultrasound, quantified clinical  
133 measures of patient function, and analyze the relationship between skeletal muscle echogenicity  
134 and patient function. For studies that included multiple age populations (i.e., a younger and older  
135 cohort,) only the data for the older cohort were extracted. Studies must have reported relationships  
136 between echogenicity and function performed through linear regression or correlation coefficients.  
137 Exclusion criteria included pathologic study populations, echogenicity outcomes on non-skeletal  
138 muscle tissue, animal or cadaver studies, or review articles. Studies including participants from a

139 pathologic population (i.e., Parkinson’s, multiple sclerosis, muscular dystrophy, etc.) were  
140 excluded. Participants with age-related conditions, such as sarcopenia or osteoarthritis, were  
141 included.

142

### 143 *2.3. Information sources and search strategy*

144 Research articles were systematically searched through CINAHL, Embase, MEDLINE,  
145 PubMed, and Web of Science databases. Studies were searched up to June 2023. The current  
146 manuscript was a subsection of larger systematic search on relationships between diagnostic  
147 ultrasound echogenicity and metabolic, imaging, and functional outcomes (PROSPERO ID  
148 CRD42020201841). Search keywords were: (echogenicity OR echo intensity OR greyscale) AND  
149 (muscle OR musculature) AND (ultrasound OR ultrasonography) AND (old OR older OR elderly).  
150 The current studies’ outcomes of interest were relationships between skeletal muscle echogenicity  
151 and objective functional assessments (i.e., strength, gait, functional testing, patient-reported  
152 outcomes, etc.). Secondary searches included: a) screening the reference lists of included studies;  
153 b) examining studies that cited the included studies (forward citation tracking through Google  
154 Scholar); c) search alerts to monitor any new search results; and d) contacting the most common  
155 authors of the included outputs. The database search was re-run in November 2023.

156

### 157 *2.4. Study appraisal and synthesis methods*

158 Database results were downloaded and transferred to the Zotero reference manager (v6.0;  
159 Corporation for Digital Scholarship, Virginia, USA). Covidence (v2627; Melbourne, AUS) was  
160 used to import all selected articles from the initial search. Duplicate articles were removed for  
161 appraisal. Two authors independently screened the articles by titles and abstracts. The two

162 reviewers met and discussed disagreements of the initial review to determine inclusion, with a  
163 third reviewer being consulted if needed. Both assessors then independently screened the full-text  
164 studies based on the inclusion and exclusion criteria using the same methodologies for  
165 disagreements. The PRISMA flowchart of article inclusion can be found in **Figure 1**. Data were  
166 extracted and were stratified on the following functional assessment categories: strength, rate of  
167 force development, gait speed, timed up-and-go, sit-to-stand, postural stability, and others. The  
168 reviewers assessed outcome measures to determine if inter-study data could be pooled for a meta-  
169 analysis.

170

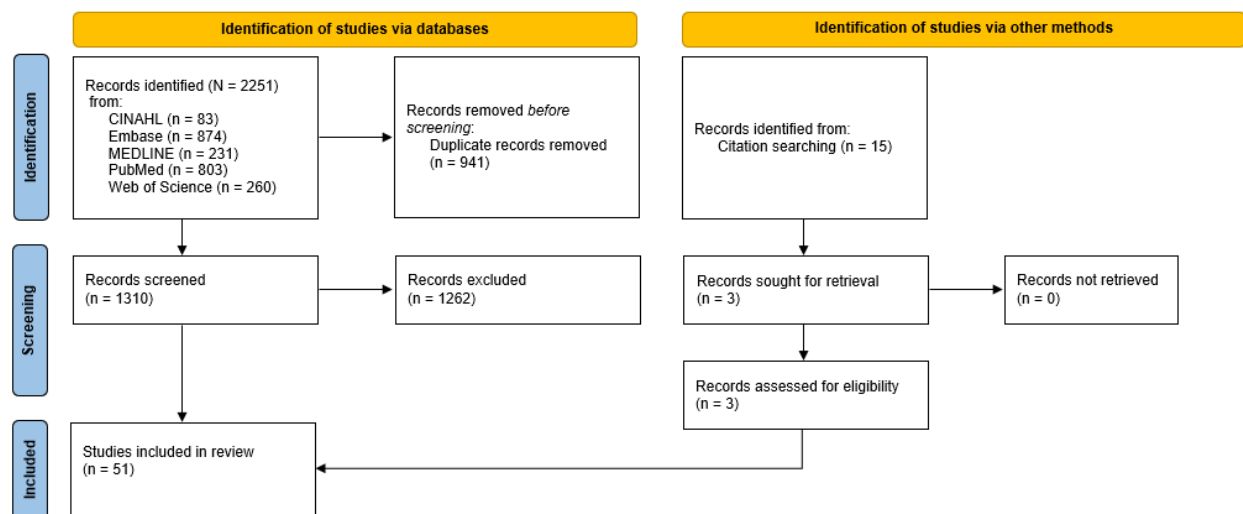

171

172 **Figure 1.** PRISMA flow chart

173

## 174 2.5. Data extraction

175 Functional assessments, methods of collection and objective measures of the tests were  
176 extracted from each selected article. The transducer type, scanning plane, and muscle of interest  
177 were extracted for measures of muscle quality. Demographics, sample size, and relationship  
178 estimates (Pearson's  $r$  correlation coefficients) were extracted for data synthesis.

179



180 2.6. *Statistical analysis*

181 2.6.1. *Correlation extraction and calculation*

182 Raw data, reported correlation coefficients, and *p*-values were extracted and entered into  
183 an Excel spreadsheet. When correlations were not provided in-text, extracted data were used to  
184 calculate Pearson's correlation coefficients (*r*) using the following formula (*r*=Pearson's  
185 correlation, *n*=number of pairs,  $\sum xy$  = sum of the pairs,  $\sum x$  = sum of the *x* scores,  $\sum y$ = sum of the  
186 *y* scores,  $\sum x^2$  = sum of the squared *x* scores,  $\sum y^2$  = sum of the squared *y* scores:

187 
$$r = \frac{n(\sum(xy) - (\sum x)(\sum y))}{\sqrt{[n \sum x^2 - (\sum x)^2][n \sum y^2 - (\sum y)^2]}}$$

188  
189 However, the above formula (and online calculators) often resulted in exceptionally strong  
190 correlations. Therefore, calculated correlations were not included in the meta-analyses. In several  
191 cases,<sup>14-24</sup> contacted authors kindly provided de-identified raw data which allowed us to calculate  
192 exact correlations using SPSS (Version 29.0, IBM Corp; Armonk, NY, USA).

193  
194 2.6.2. *Meta-analytical synthesis*

195 As Pearson's *r* correlation coefficients are a non-continuous variable (can never be greater  
196 than 1.0), all extracted and calculated correlations and standard errors were transformed to Fisher's  
197 *Z* so that confidence intervals could be properly processed by the meta-analytical software. This  
198 transformation was completed using the following formula (*Z*=Fisher's *z*, LN=natural log,  
199 *r*=Pearson's *r* correlation coefficient:

200 
$$Z = LN((1 + r))/((1 - r))/2$$

201

202 A random-effects model with restricted maximum likelihood was chosen due to inter-study  
203 variability regarding age, sex, racial/ethnic composition, and testing procedures. Pooled Fisher's  
204 Z and 95% confidence intervals (95%CI) were back-transformed to Pearson's  $r$  correlation  
205 coefficients and interpreted as: trivial  $\pm 0.10$ , small  $\pm 0.11-0.30$ , moderate  $\pm 0.31-0.50$ , large  $\pm 0.51-$   
206  $0.70$ , very large  $\pm 0.71-0.90$ , and nearly perfect  $\pm 0.91-0.99$ .<sup>25</sup> Including multiple effects from a  
207 single study violates the assumption of independence, as effects from the same study are likely to  
208 be more similar than effects from others and would influence statistical power. Therefore, effects  
209 from a single study examining several regions of the same muscle (e.g., vastus lateralis, rectus  
210 femoris), or both sexes were averaged and entered the statistical software as a single comparison.  
211 Sub-analyses were run to compare different muscles. To avoid superfluous results, meta-analyses  
212 focused on muscle groups and highly relevant functional assessments (e.g., knee extensor strength  
213 and quadriceps echogenicity). However, several commonly reported functional assessments were  
214 not accompanied by clearly relevant echogenicity measures (e.g., grip strength and wrist flexor  
215 echogenicity). Similarly, we avoided performing meta-analyses with fewer than five studies.  
216 Finally, only correlations with non-corrected echogenicity were analyzed since most studies did  
217 not utilize subcutaneous fat correction. Similar tests (i.e., time to target repetitions versus  
218 repetitions in a set time) can result in dichotomous (i.e., positive versus negative) correlational  
219 directions. Thus, the correlation direction was switched when required to represent 'performance'.

220

### 221 *2.6.2. Meta-analytical heterogeneity*

222 The  $I^2$  statistic was used to evaluate heterogeneity and was interpreted as low (<50%),  
223 moderate (50–75%), and high heterogeneity (>75%). The statistical significance threshold was set  
224 at  $p < 0.05$ . Funnel plots were used to examine publication bias potential.

225  
226  
227  
228  
229  
230  
231  
232  
233  
234  
235  
236  
237  
238  
239  
240  
241  
242  
243  
244  
245  
246  
247

### 3. Results

#### 3.1. Study characteristics

The summary of studies selected for inclusion and their quality assessments are presented in Table 1. Fifty-one identified studies conformed to the inclusion criteria.<sup>7,11,12,14–24,26–62</sup> However, 17 studies did not report the relevant correlations.<sup>14–18,20,22,24,26,40,48,49,52,57,59,61,62</sup> 12 contacted authors provided previously unpublished de-identified raw data or relevant correlations.<sup>14–20,22–24,40,48</sup> In comparison, we calculated correlations for the remaining five studies using data supplied in published tables or supplementary information. The 51 included studies included 5095 (~2759 females, ~2301 males) participants, aged  $72.5 \pm 5.8$  years of age.<sup>7,11,12,14–24,26–62</sup> Twenty-seven studies included males and females,<sup>14,17,20,23,24,26,28–30,32,33,36–38,40,42,45–47,49,54,57–62</sup> while 16 included only males,<sup>7,11,15,16,18,19,21,22,31,34,39,41,48,50,52,56</sup> seven included only females,<sup>27,35,43,44,51,53,55</sup> a single study did not report sex,<sup>12</sup> while another did not delineate sex when reporting age or participant numbers;<sup>61</sup> explaining the approximate values in the previous sentence. Two studies included participants with ‘metabolic syndrome’ or diabetes,<sup>20,33</sup> and single studies included participants with chronic obstructive pulmonary disease,<sup>42</sup> USA Veterans,<sup>11</sup> ‘frail’,<sup>24</sup> outpatients,<sup>63</sup> nursing home residents,<sup>23</sup> or regularly participated in competitive tennis.<sup>59</sup>

**Table 1.** Summary of studies reporting correlations between skeletal muscle echogenicity and functional measures in older (Mean  $\geq$  63 years) adults

| Study                             | Demographics                                                                                           | Plane                   | Muscle(s)                                               | Functional Measures                                                                                                                                | Relationship Estimates                                                                                                                                                                                                                                                                                                                                                                                                                                                                                                                                                                                                                                                                                                                                                                                                                                                                                                                                         |
|-----------------------------------|--------------------------------------------------------------------------------------------------------|-------------------------|---------------------------------------------------------|----------------------------------------------------------------------------------------------------------------------------------------------------|----------------------------------------------------------------------------------------------------------------------------------------------------------------------------------------------------------------------------------------------------------------------------------------------------------------------------------------------------------------------------------------------------------------------------------------------------------------------------------------------------------------------------------------------------------------------------------------------------------------------------------------------------------------------------------------------------------------------------------------------------------------------------------------------------------------------------------------------------------------------------------------------------------------------------------------------------------------|
| Akagi et al., 2018 <sup>1</sup>   | Elderly<br>N=33 (14 F, 19 M)<br>F: 72 $\pm$ 7 yrs<br>M: 73 $\pm$ 5 yrs                                 | Transverse<br>Snap-shot | Plantar-flexors (avg LG, soleus)<br>Non-corrected EI    | ISO plantar-flexion force                                                                                                                          | Female:<br>r=-0.74, p<0.05* $\chi$<br>Male:<br>r=-0.35, p<0.05* $\chi$                                                                                                                                                                                                                                                                                                                                                                                                                                                                                                                                                                                                                                                                                                                                                                                                                                                                                         |
| Akazawa et al., 2017 <sup>2</sup> | Unable to walk<br>66-101 yrs<br>N=25 F                                                                 | Transverse<br>Snap-shot | Quadriceps (avg RF, VL, VI, VM)<br>Non-corrected EI     | 1) ISO knee extension force<br>2) Functional independence measure gait score                                                                       | 1) r=-0.64, p=0.001<br>2) r=-0.34, p=0.03                                                                                                                                                                                                                                                                                                                                                                                                                                                                                                                                                                                                                                                                                                                                                                                                                                                                                                                      |
| Akima et al., 2017 <sup>3</sup>   | Healthy<br>72.9 $\pm$ 4.5 yrs<br>N=64 (37 F, 27 M)                                                     | Transverse<br>Snap-shot | RF, VL, Quadriceps (avg RF, VL)<br>Non-corrected EI     | 1) Sit-up $\times$ 30s<br>2) Supine-to-stand<br>3) Sit-to-stand $\times$ 10<br>4) 5-meter maximal walk<br>5) 6-min walk                            | <b>RF (F):</b><br>1) r=-0.11, p>0.05<br>2) r=0.06, p>0.05<br>3) r=0.51, p<0.001*<br>4) r=0.26, p>0.05<br>5) r=-0.16, p>0.05<br><b>RF (M):</b><br>1) r=-0.07, p>0.05<br>2) r=0.47, p<0.05*<br>3) r=0.40, p<0.05*<br>4) r=0.16, p>0.05<br>5) r=-0.36, p>0.05<br><b>VL (F):</b><br>1) r=-0.23, p>0.05<br>2) r=-0.03, p>0.05<br>3) r=0.17, p>0.05<br>4) r=0.23, p>0.05<br>5) r=0.01, p>0.05<br><b>VL (M):</b><br>1) r=-0.25, p>0.05<br>2) r=0.53, p<0.05*<br>3) r=0.52, p<0.05*<br>4) r=0.48, p<0.05*<br>5) r=-0.52, p<0.01*<br><b>Quadriceps (F):</b><br>1) r=-0.17, p>0.05<br>2) r=0.02, p>0.05<br>3) r=0.39, p<0.05*<br>4) r=0.27, p>0.05<br>5) r=-0.09, p>0.05<br><b>Quadriceps (M):</b><br>1) r=-0.17, p>0.05<br>2) r=0.54, p<0.05*<br>3) r=0.49, p<0.05*<br>4) r=0.34, p<0.05*<br>5) r=-0.47, p<0.05*                                                                                                                                                        |
| Akima et al., 2020 <sup>4</sup>   | 'Pre-old'<br>69.3 $\pm$ 2.7 yrs<br>n=96 (51 F, 45 M)<br>'Old'<br>79 $\pm$ 2.9 yrs<br>n=36 (19 F, 17 M) | Transverse<br>Snap-shot | RF, VL, Quadriceps (avg RF, VL)<br>Non-corrected EI     | 1) Grip strength<br>2) Sit-up reps<br>3) Supine-to-stand<br>4) Sit-to-stand $\times$ 10<br>5) 5-meter maximal walk<br>6) 6-min walk                | <b>RF:</b><br><b>Pre-old</b><br>1) r=-0.26, p<0.05*<br>2) r=-0.13, p>0.05<br>3) r=0.23, p<0.05*<br>4) r=0.27, p<0.01*<br>5) r=0.13, p>0.05<br>6) r=-0.18, p>0.05<br><b>Old</b><br>1) r=-0.22, p>0.05<br>2) r=-0.01, p>0.05<br>3) r=0.11, p>0.05<br>4) r=0.13, p>0.05<br>5) r=0.43, p<0.05*<br>6) r=-0.24, p>0.05<br><b>VL:</b><br><b>Pre-old</b><br>1) r=-0.28, p<0.01*<br>2) r=-0.13, p>0.05<br>3) r=0.13, p>0.05<br>4) r=0.10, p>0.05<br>5) r=-0.05, p>0.05<br>6) r=-0.12, p>0.05<br><b>Old</b><br>1) r=-0.30, p>0.05<br>2) r=-0.21, p>0.05<br>3) r=0.34, p>0.05<br>4) r=0.18, p>0.05<br>5) r=0.39, p<0.05*<br>6) r=-0.18, p<0.05<br><b>Quadriceps:</b><br><b>Pre-old</b><br>1) r=-0.30, p<0.05*<br>2) r=-0.14, p>0.05<br>3) r=0.20, p>0.05<br>4) r=0.20, p<0.05*<br>5) r=0.04, p>0.05<br>6) r=-0.17, p>0.05<br><b>Old</b><br>1) r=-0.31, p>0.05<br>2) r=-0.15, p>0.05<br>3) r=0.29, p>0.05<br>4) r=0.19, p>0.05<br>5) r=0.47, p<0.01*<br>6) r=-0.24, p>0.05 |
| Bali et al., 2020 <sup>5</sup>    | 71 $\pm$ 5 yrs<br>N=25 (15 F, 10 M)                                                                    | Transverse<br>Panoramic | Quadriceps (avg RF, VL)<br>Corrected & non-corrected EI | 1) CON (120 $^{\circ}$ .s $^{-1}$ ) knee extension torque<br>2) Specific torque<br>3) % $\Delta$ torque (fatigue)                                  | <b>Non-corrected EI:</b><br>1) r=-0.53, p<0.001*<br>2) r=-0.34, p=0.014*<br>3) r=-0.08, p=0.565<br><b>Corrected EI:</b><br>1) r=-0.45, p<0.001*<br>2) r=-0.34, p=0.014*<br>3) r=0.02, p=0.864                                                                                                                                                                                                                                                                                                                                                                                                                                                                                                                                                                                                                                                                                                                                                                  |
| Cadore et al., 2012 <sup>6</sup>  | 65.5 $\pm$ 5 yrs<br>N=31 M                                                                             | Not specified           | RF<br>Non-corrected EI                                  | 1) ISO knee extension torque<br>2) CON knee extension (a: 60 $^{\circ}$ .s $^{-1}$ , b: 180 $^{\circ}$ .s $^{-1}$ , c: 360 $^{\circ}$ .s $^{-1}$ ) | 1) r=-0.51, p<0.01*<br>2a) r=-0.48, p<0.01*<br>2b) r=-0.64, p<0.001*<br>2c) r=-0.67, p<0.001*                                                                                                                                                                                                                                                                                                                                                                                                                                                                                                                                                                                                                                                                                                                                                                                                                                                                  |

|                                      |                                                                                                                       |                         |                                                 |                                                                                                                                                                                                                                                                                                      |                                                                                                                                                                                                                                                               |                                                                                                                                                                                                                                                     |                                                                                                                                                                                                                                   |                                                                             |
|--------------------------------------|-----------------------------------------------------------------------------------------------------------------------|-------------------------|-------------------------------------------------|------------------------------------------------------------------------------------------------------------------------------------------------------------------------------------------------------------------------------------------------------------------------------------------------------|---------------------------------------------------------------------------------------------------------------------------------------------------------------------------------------------------------------------------------------------------------------|-----------------------------------------------------------------------------------------------------------------------------------------------------------------------------------------------------------------------------------------------------|-----------------------------------------------------------------------------------------------------------------------------------------------------------------------------------------------------------------------------------|-----------------------------------------------------------------------------|
| Chang et al., 2018 <sup>7</sup>      | 71.6±5.3 yrs<br>N=140 (79 F, 61 M)                                                                                    | Transverse<br>Snap-shot | RF, MG, BB, TB<br>Non-corrected EI              | 1) Grip strength<br>2) Gait speed                                                                                                                                                                                                                                                                    | <b>RF:</b><br>1) $r=-0.35, p<0.05^*$<br>2) $r=-0.13, p>0.05$                                                                                                                                                                                                  | <b>MG:</b><br>1) $r=-0.10, p>0.05$<br>2) $r=-0.07, p>0.05$                                                                                                                                                                                          | <b>BB:</b><br>1) $r=-0.25, p<0.05^*$<br>2) $r=-0.14, p>0.05$                                                                                                                                                                      | <b>TB:</b><br>1) $r=-0.31, p<0.05^*$<br>2) $r=-0.02, p>0.05$                |
| Chang et al., 2019 <sup>8</sup>      | Non-metabolic syndrome<br>71.1±5.2 yrs<br>N=103 (51F, 52 M)<br>Metabolic syndrome<br>72.1±4.7 yrs<br>N=26 (18 F, 8 M) | Transverse<br>Snap-shot | RF, MG, BB, TB<br>Non-corrected                 | 1) Grip strength<br>2) Gait speed                                                                                                                                                                                                                                                                    | <b>RF:<br/>Combined</b><br>1) $r=-0.32, p<0.001^*$<br>2) $r=-0.18, p=0.045^*$                                                                                                                                                                                 | <b>MG:<br/>Combined</b><br>1) $r=-0.04, p=0.588$<br>2) $r=-0.11, p=0.202$                                                                                                                                                                           | <b>BB:<br/>Combined</b><br>1) $r=-0.30, p<0.001^*$<br>2) $r=-0.12, p=0.197$                                                                                                                                                       | <b>TB:<br/>Combined</b><br>1) $r=-0.30, p<0.001^*$<br>2) $r=-0.08, p=0.353$ |
| Farrow & Palmer, 2021 <sup>9</sup>   | 73±4 yrs<br>N=15 M                                                                                                    | Transverse<br>Panoramic | RF<br>Non-corrected EI                          | 1) ISO hip flexion torque<br>2) RTD 0-100 ms (a: absolute; b: relative)<br>3) RTD 100-200 ms (a: absolute; b: relative)                                                                                                                                                                              |                                                                                                                                                                                                                                                               |                                                                                                                                                                                                                                                     | 1) $r=-0.26, p>0.05$<br>2a) $r=0.25, p>0.05$<br>2b) $r=0.40, p>0.05$<br>3a) $r=-0.42, p>0.05$<br>3b) $r=-0.42, p>0.05$                                                                                                            |                                                                             |
| Fukumoto et al., 2012 <sup>10</sup>  | 70.4±5.5 yrs<br>N=92 F                                                                                                | Transverse<br>Snap-shot | RF<br>Non-corrected EI                          | ISO knee extension force                                                                                                                                                                                                                                                                             |                                                                                                                                                                                                                                                               |                                                                                                                                                                                                                                                     | $r=-0.40, p<0.01^*$                                                                                                                                                                                                               |                                                                             |
| Fukumoto et al., 2023 <sup>11</sup>  | 75.3±6.7 yrs<br>N=92 (50 F, 42 M)                                                                                     | Transverse<br>Snap-shot | RF<br>Non-corrected EI                          | 1) ISO knee extension torque<br>2) Grip strength<br>3) Walking speed                                                                                                                                                                                                                                 | <b>Female:</b><br>1) $r=-0.43, p=0.003 \Phi$<br>2) $r=-0.23, p=0.110 \Phi$<br>3) $r=-0.22, p=0.133 \Phi$                                                                                                                                                      | <b>Male:</b><br>1) $r=-0.15, p=0.339 \Phi$<br>2) $r=-0.32, p=0.044^* \Phi$<br>3) $r=-0.22, p=0.18 \Phi$                                                                                                                                             | <b>Combined:</b><br>1) $r=-0.44, p<0.001^* \Phi$<br>2) $r=-0.46, p<0.001^* \Phi$<br>3) $r=-0.31, p=0.003^* \Phi$                                                                                                                  |                                                                             |
| Gerstner et al., 2017a <sup>12</sup> | 69.5±3.1 yrs<br>N=20 M                                                                                                | Transverse<br>Panoramic | MG, LG<br>Corrected and non-corrected $\Phi$ EI | 1) ISO plantar-flexion torque<br>2) CON plantar-flexion torque (a: 30°·s <sup>-1</sup> ; b: 120°·s <sup>-1</sup> )<br>3) CON plantar-flexion peak power (a: 30°·s <sup>-1</sup> ; b: 120°·s <sup>-1</sup> )<br>4) CON plantar-flexion mean power (a: 30°·s <sup>-1</sup> ; b: 120°·s <sup>-1</sup> ) | <b>Non-corrected:<br/>MG:</b><br>1) $r=-0.50, p=0.030^* \Phi$<br>2a) $r=-0.62, p=0.005^* \Phi$<br>2b) $r=-0.38, p=0.114 \Phi$<br>3a) $r=-0.62, p=0.005^* \Phi$<br>3b) $r=-0.38, p=0.114 \Phi$<br>4a) $r=-0.67, p=0.002^* \Phi$<br>4b) $r=-0.43, p=0.066 \Phi$ | <b>Corrected:<br/>MG:</b><br>1) $r=-0.36, p=0.132 \Phi$<br>2a) $r=-0.45, p=0.054 \Phi$<br>2b) $r=-0.40, p=0.087 \Phi$<br>3a) $r=-0.45, p=0.053 \Phi$<br>3b) $r=-0.40, p=0.087 \Phi$<br>4a) $r=-0.57, p=0.012^* \Phi$<br>4b) $r=-0.43, p=0.065 \Phi$ | <b>LG:</b><br>1) $r=0.15, p=0.530 \Phi$<br>2a) $r=-0.28, p=0.251 \Phi$<br>2b) $r=-0.39, p=0.098 \Phi$<br>3a) $r=-0.28, p=0.253 \Phi$<br>3b) $r=-0.39, p=0.098 \Phi$<br>4a) $r=-0.23, p=0.335 \Phi$<br>4b) $r=-0.27, p=0.273 \Phi$ |                                                                             |
| Gerstner et al., 2017b <sup>13</sup> | Recreationally Active<br>69.5±3.3 yrs<br>N=20 M                                                                       | Transverse<br>Panoramic | MG<br>Corrected and non-corrected $\Phi$ EI     | 1) ISO plantar-flexion a) peak torque; b) torque at 50 ms; c) torque at 100 ms; d) torque at 200 ms)<br>2) Peak RFD $\Phi$                                                                                                                                                                           | <b>Non-corrected <math>\Phi</math>:</b><br>1a) $r=-0.46, p<0.001^* \Phi$<br>1b) $r=-0.04, p=0.779 \Phi$<br>1c) $r=-0.22, p=0.125 \Phi$<br>1d) $r=-0.39, p=0.005^* \Phi$<br>2) $r=-0.34, p=0.014^* \Phi$                                                       | <b>Corrected:</b><br>1a) $r=-0.36, p=0.008^* \Phi$<br>1b) $r=0.00, p=0.976 \Phi$<br>1c) $r=-0.20, p=0.161 \Phi$<br>1d) $r=-0.36, p=0.008^* \Phi$<br>2) $r=-0.34, p=0.013^* \Phi$                                                                    |                                                                                                                                                                                                                                   |                                                                             |

|                                        |                                                                |            |                              |                                                                                                                                                                                                                                                |                                                                                                                                                                                                   |                                                                                                                                                                                                  |                                                                                                                                                                                                                |                                                                                                                                                                                                               |
|----------------------------------------|----------------------------------------------------------------|------------|------------------------------|------------------------------------------------------------------------------------------------------------------------------------------------------------------------------------------------------------------------------------------------|---------------------------------------------------------------------------------------------------------------------------------------------------------------------------------------------------|--------------------------------------------------------------------------------------------------------------------------------------------------------------------------------------------------|----------------------------------------------------------------------------------------------------------------------------------------------------------------------------------------------------------------|---------------------------------------------------------------------------------------------------------------------------------------------------------------------------------------------------------------|
| Guadagnin et al., 2019 <sup>14</sup>   | 75.4±5 yrs<br>N=15 (9 F, 6 M)                                  | Transverse | RF, VL, BF, TA, MG           | 1) Preferred walking speed (a: overground; b: obstacle)<br>2) Maximal walking speed (a: overground; b: obstacle)<br>3) Preferred walking step length<br>4) Maximal walking step length                                                         | <b>RF:</b><br>1a) r=-0.07, p>0.05<br>1b) r=-0.03, p>0.05<br>2a) r=-0.07, p>0.05<br>2b) r=-0.01, p>0.05<br>3) r=-0.004, p>0.05<br>4) r=-0.05, p>0.05                                               | <b>TA:</b><br>1a) r=-0.40, p>0.05<br>1b) r=-0.31, p>0.05<br>2a) r=-0.44, p>0.05<br>2b) r=-0.35, p>0.05<br>3) r=-0.31, p>0.05<br>4) r=-0.36, p>0.05                                               |                                                                                                                                                                                                                |                                                                                                                                                                                                               |
|                                        |                                                                | Snap-shot  | Non-corrected EI             |                                                                                                                                                                                                                                                | <b>BF:</b><br>1a) r=0.17, p>0.05<br>1b) r=0.02, p>0.05<br>2a) r=0.15, p>0.05<br>2b) r=0.08, p>0.05<br>3) r=-0.06, p>0.05<br>4) r=-0.07, p>0.05                                                    | <b>MG:</b><br>1a) r=-0.08, p>0.05<br>1b) r=-0.11, p>0.05<br>2a) r=-0.13, p>0.05<br>2b) r=-0.07, p>0.05<br>3) r=-0.02, p>0.05<br>4) r=-0.07, p>0.05                                               |                                                                                                                                                                                                                |                                                                                                                                                                                                               |
| Harris-Love et al., 2018 <sup>15</sup> | US Veterans<br>62.5±9.2<br>N=30 M                              | Sagittal   | RF                           | 1) Absolute and body-mass normalized CON knee extension torque (a: 60°s <sup>-1</sup> ; b: 180°s <sup>-1</sup> )<br>2) Grip strength                                                                                                           | <b>Absolute:</b><br>1a) r=-0.38, p=0.038*<br>1b) r=-0.41, p=0.025*<br>2) r=-0.41, p=0.026*                                                                                                        | <b>Normalized:</b><br>1a) r=-0.47, p=0.008*<br>1a) r=-0.49, p=0.006*<br>2) r=-0.50, p=0.005*                                                                                                     |                                                                                                                                                                                                                |                                                                                                                                                                                                               |
|                                        |                                                                | Snap-shot  | Non-corrected                |                                                                                                                                                                                                                                                |                                                                                                                                                                                                   |                                                                                                                                                                                                  |                                                                                                                                                                                                                |                                                                                                                                                                                                               |
| Harris-Love et al., 2019 <sup>16</sup> | 65.1±6.5<br>N=17 (10 F, 7 M)                                   | Sagittal   | RF                           | Grip strength (body-mass normalized)                                                                                                                                                                                                           |                                                                                                                                                                                                   | r=-0.48, p=0.031*                                                                                                                                                                                |                                                                                                                                                                                                                |                                                                                                                                                                                                               |
|                                        |                                                                | Snap-shot  | Non-corrected                |                                                                                                                                                                                                                                                |                                                                                                                                                                                                   |                                                                                                                                                                                                  |                                                                                                                                                                                                                |                                                                                                                                                                                                               |
| Hill et al., 2021 <sup>17</sup>        | Healthy community-dwelling<br>69.9±4.3 yrs<br>N=21 (9 F, 12 M) | Transverse | VL, gluteus medius           | 1) Timed-up-and-go<br>2) Sit-to-stand×5 reps<br>3) Postural control (a: anteriorposterior eyes open; b: anteriorposterior eyes closed; c: mediolateral eyes open; d: mediolateral eyes closed; e: velocity eyes open; f: velocity eyes closed) | <b>Right VL:</b><br>1) r=0.49, p<0.05*<br>2) r=0.57, p<0.001*<br>3a) r=0.26, p>0.05<br>3b) r=0.32, p>0.05<br>3c) r=0.22, p>0.05<br>3d) r=0.29, p>0.05<br>3e) r=0.09, p>0.05<br>3f) r=0.13, p>0.05 | <b>Left VL:</b><br>1) r=0.52, p<0.05*<br>2) r=0.64, p<0.001*<br>3a) r=0.36, p>0.05<br>3b) r=0.20, p>0.05<br>3c) r=0.04, p>0.05<br>3d) r=0.06, p>0.05<br>3e) r=0.30, p>0.05<br>3f) r=0.06, p>0.05 | <b>Right gluteus medius:</b><br>1) r=0.46, p<0.05*<br>2) r=0.48, p<0.05*<br>3a) r=0.52, p<0.05*<br>3b) r=0.51, p<0.05*<br>3c) r=0.15, p>0.05<br>3d) r=0.19, p>0.05<br>3e) r=0.22, p>0.05<br>3f) r=0.08, p>0.05 | <b>Left gluteus medius:</b><br>1) r=0.52, p<0.05*<br>2) r=0.59, p<0.05*<br>3a) r=0.53, p<0.05*<br>3b) r=0.45, p<0.05*<br>3c) r=0.10, p>0.05<br>3d) r=0.11, p>0.05<br>3e) r=0.27, p>0.05<br>3f) r=0.02, p>0.05 |
|                                        |                                                                | Snap-shot  | Non-corrected EI             |                                                                                                                                                                                                                                                |                                                                                                                                                                                                   |                                                                                                                                                                                                  |                                                                                                                                                                                                                |                                                                                                                                                                                                               |
| Hirata et al., 2022 <sup>18</sup>      | 74±6 yrs<br>N=32 M                                             | Transverse | RF, VL                       | 1) ISO knee extension torque<br>2) ISO knee extension specific strength<br>3) CON isotonic peak power (a: absolute; b: relative)<br>4) CON isotonic RPD 0-50 ms (a: absolute; b: relative)<br>5) CON isotonic RVD                              | <b>RF:</b><br>1) r=0.13, p=0.476<br>2) r=-0.02, p=0.922<br>3a) r=-0.23, p=0.221<br>3b) r=0.01, p=0.952<br>4a) r=-0.21, p=0.272<br>4b) r=-0.36, p=0.050<br>5) r=-0.42, p=0.022*                    | <b>VL:</b><br>1) r=0.13, p=0.494<br>2) r=0.08, p=0.673<br>3a) r=0.33, p=0.074<br>3b) r=0.42, p=0.020*<br>4a) r=0.25, p=0.183<br>4b) r=0.32, p=0.089<br>5) r=0.24, p=0.207                        |                                                                                                                                                                                                                |                                                                                                                                                                                                               |
|                                        |                                                                | Snap-shot  | Non-corrected EI             |                                                                                                                                                                                                                                                |                                                                                                                                                                                                   |                                                                                                                                                                                                  |                                                                                                                                                                                                                |                                                                                                                                                                                                               |
| Kawai et al., 2018 <sup>19</sup>       | Community-dwelling<br>72.8±5.3 yrs<br>N=1239 (728 F, 511 M)    | Transverse | RF                           | 1) ISO knee extension torque<br>2) Timed-up-and-go<br>3) Fast gait speed<br>4) Normal gait speed<br>5) One-leg balance                                                                                                                         | <b>Female:</b><br>1) r=-0.27, p<0.01*<br>2) r=0.16, p<0.001* Φ<br>3) r=-0.14, p<0.001* Φ<br>4) r=-0.10, p=0.006* Φ<br>5) r=-0.17, p<0.001* Φ                                                      | <b>Male:</b><br>1) r=-0.31, p<0.01*<br>2) r=0.19, p<0.001* Φ<br>3) r=-0.20, p<0.001* Φ<br>4) r=-0.19, p<0.001* Φ<br>5) r=-0.26, p<0.001* Φ                                                       | <b>Combined:</b><br>1) r=-0.35, p<0.001* Φ<br>2) r=0.19, p<0.001* Φ<br>3) r=-0.20, p<0.001* Φ<br>4) r=-0.13, p<0.001* Φ<br>5) r=-0.18, p<0.001* Φ                                                              |                                                                                                                                                                                                               |
|                                        |                                                                | Snap-shot  | Non-corrected EI             |                                                                                                                                                                                                                                                |                                                                                                                                                                                                   |                                                                                                                                                                                                  |                                                                                                                                                                                                                |                                                                                                                                                                                                               |
| Komforti et al., 2021 <sup>20</sup>    | Community-dwelling<br>74±6 yrs<br>N=90 (57 F, 33 M)            | Transverse | RF, VL, MG, LG               | 1) Grip strength Φ<br>2) Sit-to-stand×30s Φ<br>3) Fast gait speed<br>4) Normal gait speed Φ<br>5) Heel-rise endurance Φ                                                                                                                        | <b>RF:</b><br>Non-corrected Φ<br>1) r=-0.03, p=0.754<br>2) r=-0.16, p=0.134<br>3) r=0.08, p=0.457                                                                                                 | <b>VL:</b><br>Non-corrected Φ<br>1) r=-0.05, p=0.668<br>2) r=-0.23, p=0.028*<br>3) r=0.14, p=0.192                                                                                               | <b>MG:</b><br>Non-corrected Φ<br>1) r=-0.03, p=0.757<br>2) r=-0.15, p=0.154<br>3) r=0.17, p=0.121                                                                                                              | <b>LG:</b><br>Non-corrected Φ<br>1) r=0.03, p=0.766<br>2) r=-0.11, p=0.296<br>3) r=0.06, p=0.579                                                                                                              |
|                                        |                                                                | Snap-shot  | Corrected & non-corrected EI |                                                                                                                                                                                                                                                |                                                                                                                                                                                                   |                                                                                                                                                                                                  |                                                                                                                                                                                                                |                                                                                                                                                                                                               |

|                                           |                                                                                  |                                                                       |                                                                                   |                                                                                                                                                                                                         |                                                                                                                                                                                                 |                                                                                                                                                                                               |                                                                                                                                                                                                |                                                                                                                                                                          |
|-------------------------------------------|----------------------------------------------------------------------------------|-----------------------------------------------------------------------|-----------------------------------------------------------------------------------|---------------------------------------------------------------------------------------------------------------------------------------------------------------------------------------------------------|-------------------------------------------------------------------------------------------------------------------------------------------------------------------------------------------------|-----------------------------------------------------------------------------------------------------------------------------------------------------------------------------------------------|------------------------------------------------------------------------------------------------------------------------------------------------------------------------------------------------|--------------------------------------------------------------------------------------------------------------------------------------------------------------------------|
|                                           |                                                                                  |                                                                       |                                                                                   | 6) Functional reach test $\Phi$                                                                                                                                                                         | 4) $r=0.07, p=0.497$<br>5) $r=-0.19, p=0.081$<br>6) $r=0.11, p=0.285$                                                                                                                           | 4) $r=0.16, p=0.145$<br>5) $r=-0.22, p=0.042^*$<br>6) $r=0.13, p=0.227$                                                                                                                       | 4) $r=0.15, p=0.156$<br>5) $r=-0.19, p=0.081$<br>6) $r=0.23, p=0.032^*$                                                                                                                        | 4) $r=0.05, p=0.655$<br>5) $r=-0.10, p=0.370$<br>6) $r=0.19, p=0.079$                                                                                                    |
|                                           |                                                                                  |                                                                       |                                                                                   |                                                                                                                                                                                                         | <b>Corrected</b><br>1) $r=-0.31, p=0.003^*$<br>2) $r=-0.27, p=0.010^*$<br>3) $r=-0.29, p=0.006^*$<br>4) $r=0.21, p=0.051$<br>5) $r=-0.29, p=0.006^*$<br>6) $r=0.07, p=0.491$                    | <b>Corrected</b><br>1) $r=-0.41, p<0.001^*$<br>2) $r=-0.25, p=0.018$<br>3) $r=-0.25, p=0.018$<br>4) $r=0.21, p=0.051$<br>5) $r=-0.24, p=0.022^*$<br>6) $r=0.09, p=0.376$                      | <b>Corrected</b><br>1) $r=-0.28, p=0.008^*$<br>2) $r=-0.33, p=0.002^*$<br>3) $r=-0.35, p<0.001^*$<br>4) $r=0.27, p=0.011^*$<br>5) $r=-0.30, p=0.005^*$<br>6) $r=0.18, p=0.086$                 | <b>Corrected</b><br>1) $r=-0.22, p=0.040^*$<br>2) $r=-0.22, p=0.040^*$<br>3) $r=-0.18, p=0.086$<br>4) $r=0.09, p=0.404$<br>5) $r=-0.17, p=0.103$<br>6) $r=0.20, p=0.055$ |
| Lopez et al., 2016 <sup>21</sup>          | Sedentary<br>66±5.4 yrs<br>N=50 M                                                | Transverse<br><br>Snap-shot                                           | avg: RF, VL, VM, VI<br><br>Non-corrected EI                                       | 1) Sit-to-stand×30s                                                                                                                                                                                     |                                                                                                                                                                                                 |                                                                                                                                                                                               | 1) $r=-0.56, p<0.001^*$                                                                                                                                                                        |                                                                                                                                                                          |
| Maddocks et al., 2014 <sup>22</sup>       | Healthy<br>63±10 yrs<br>N=18 (9 F, 9 M)<br>COPD<br>68±10 yrs<br>N=17 (7 F, 10 M) | Transverse<br><br>Snap-shot                                           | TA<br><br>Non-corrected EI                                                        | 1) ISO dorsiflexion force                                                                                                                                                                               |                                                                                                                                                                                                 |                                                                                                                                                                                               | $r=-0.46, p=0.0004^*$                                                                                                                                                                          |                                                                                                                                                                          |
| Magrini et al., 2018 <sup>23</sup>        | 74.9±5.8 yrs<br>N=18 F                                                           | Transverse<br><br>Panoramic                                           | RF<br><br>Non-corrected EI                                                        | 1) ISO knee extension torque<br>2) Sit-to-stand×60s (a: peak power; b: mean power; c: peak velocity; d: mean velocity)                                                                                  |                                                                                                                                                                                                 | 1) $r=-0.34, p>0.05$                                                                                                                                                                          |                                                                                                                                                                                                | 2a) $r=-0.48, p>0.05$<br>2b) $r=-0.37, p>0.05$<br>2c) $r=-0.38, p>0.05$<br>2d) $r=0.02, p>0.05$                                                                          |
| Masaki et al., 2016 <sup>24</sup>         | 72.9±7.4 yrs<br>N=35 F                                                           | Transverse (multifidus)<br><br>Sagittal (erector spinae, psoas major) | Multifidus, erector spinae, psoas major<br><br>Non-corrected EI                   | 1) Maximal gait speed<br>2) Normal gait speed                                                                                                                                                           | <b>Multifidus:</b><br>1) $r=-0.01, p>0.05$<br>2) $r=0.09, p>0.05$                                                                                                                               |                                                                                                                                                                                               | <b>Erector spinae:</b><br>1) $r=0.10, p>0.05$<br>2) $r=0.06, p>0.05$                                                                                                                           | <b>Psoas major:</b><br>1) $r=-0.30, p>0.05$<br>2) $r=0.02, p>0.05$                                                                                                       |
| Mateos-Angulo et al., 2021 <sup>25</sup>  | 85±7 yrs<br>N=20 (15 F, 5 M)                                                     | Sagittal<br><br>Snap-shot                                             | UL: avg: BB, wrist flexors<br><br>LL: avg: RF, VL, TA, MG<br><br>Non-corrected EI | 1) CON knee extension force<br>2) Grip strength<br>3) Timed-up-and-go<br>4) Gait speed<br>5) Short physical performance battery<br>6) Tinetti performance-oriented mobility test                        | <b>UL:</b><br>1) $r=-0.52, p<0.05^*$<br>2) $r=-0.04, p>0.05$<br>3) $r=0.21, p>0.05$<br>4) $r=-0.14, p>0.05$<br>5) $r=-0.32, p>0.05$<br>6) $r=-0.05, p>0.05$                                     |                                                                                                                                                                                               | <b>LL:</b><br>1) $r=-0.68, p<0.01^*$<br>2) $r=-0.27, p>0.05$<br>3) $r=0.34, p>0.05$<br>4) $r=-0.56, p<0.05^*$<br>5) $r=-0.58, p<0.01^*$<br>6) $r=-0.44, p<0.05^*$                              |                                                                                                                                                                          |
| Mirón Mombiela et al., 2017 <sup>26</sup> | Outpatients<br>63 ±15.8 yrs<br>N=112 (51 F, 61 M)                                | Transverse<br><br>Snap-shot                                           | RF<br><br>Non-corrected EI                                                        | Grip strength                                                                                                                                                                                           |                                                                                                                                                                                                 | <b>Female:</b><br>$r=-0.52, p<0.01^*$                                                                                                                                                         |                                                                                                                                                                                                | <b>Male:</b><br>$r=-0.36, p<0.01^*$                                                                                                                                      |
| Mota et al., 2018 <sup>27</sup>           | Recreationally active<br>69±3 yrs<br>N=22 M                                      | Transverse<br><br>Panoramic                                           | MG $\Phi$ , LG $\Phi$ , avg: MG, LG<br><br>Corrected and non-corrected $\Phi$ EI  | 1: ISO Plantar-flexion peak torque $\Phi$<br>2: 30°·s <sup>-1</sup> CON Plantar-flexion (a: peak torque; b) RVD) $\Phi$<br>3: 120°·s <sup>-1</sup> CON Plantar-flexion (a: peak torque $\Phi$ ; b) RVD) | <b>MG:</b><br><b>Non-corrected:</b><br>1) $r=-0.05, p=0.834 \Phi$<br>2a) $r=-0.10, p=0.658 \Phi$<br>2b) $r=-0.01, p=0.953 \Phi$<br>3a) $r=-0.09, p=0.683 \Phi$<br>3b) $r=-0.44, p=0.043^* \Phi$ | <b>LG:</b><br><b>Non-corrected:</b><br>1) $r=-0.26, p=0.243 \Phi$<br>2a) $r=0.01, p=0.970 \Phi$<br>2b) $r=0.05, p=0.823 \Phi$<br>3a) $r=-0.07, p=0.755 \Phi$<br>3b) $r=-0.53, p=0.012^* \Phi$ | <b>MG+LG:</b><br><b>Corrected:</b><br>1) $r=-0.04, p=0.0861 \Phi$<br>2a) $r=0.01, p=0.988 \Phi$<br>2b) $r=-0.13, p=0.562 \Phi$<br>3a) $r=-0.12, p=0.587 \Phi$<br>3b) $r=-0.49, p=0.020^* \Phi$ |                                                                                                                                                                          |

|                                      |                                      |                         |                                                 | <b>Corrected:</b>                                                                                                                                                                                   | <b>Corrected:</b>                                                                                                                                                                                                                                                                                                                                                                                                                                                    |
|--------------------------------------|--------------------------------------|-------------------------|-------------------------------------------------|-----------------------------------------------------------------------------------------------------------------------------------------------------------------------------------------------------|----------------------------------------------------------------------------------------------------------------------------------------------------------------------------------------------------------------------------------------------------------------------------------------------------------------------------------------------------------------------------------------------------------------------------------------------------------------------|
|                                      |                                      |                         |                                                 | 1) $r=-0.13, p=0.580 \Phi$                                                                                                                                                                          | 1) $r=-0.16, p=0.466 \Phi$                                                                                                                                                                                                                                                                                                                                                                                                                                           |
|                                      |                                      |                         |                                                 | 2a) $r=0.01, p=0.975 \Phi$                                                                                                                                                                          | 2a) $r=0.00, p=0.998 \Phi$                                                                                                                                                                                                                                                                                                                                                                                                                                           |
|                                      |                                      |                         |                                                 | 2b) $r=-0.20, p=0.365 \Phi$                                                                                                                                                                         | 2b) $r=-0.03, p=0.895 \Phi$                                                                                                                                                                                                                                                                                                                                                                                                                                          |
|                                      |                                      |                         |                                                 | 3a) $r=-0.16, p=0.469 \Phi$                                                                                                                                                                         | 3a) $r=-0.05, p=0.822 \Phi$                                                                                                                                                                                                                                                                                                                                                                                                                                          |
|                                      |                                      |                         |                                                 | 3b) $r=-0.33, p=0.139 \Phi$                                                                                                                                                                         | 3b) $r=-0.48, p=0.026^* \Phi$                                                                                                                                                                                                                                                                                                                                                                                                                                        |
| Mota & Stock, 2017 <sup>28</sup>     | 74±6 yrs<br>N=13 M                   | Sagittal<br>Snap-shot   | RF<br>Corrected & non-corrected $\Phi$ EI       | <b>Non-corrected: <math>\Phi</math></b><br>1a) $r=-0.49, p=0.093 \Phi$<br>1b) $r=-0.10, p=0.745 \Phi$<br>2) $r=-0.47, p=0.102 \Phi$                                                                 | <b>Corrected:</b><br>1a) $r=-0.52, p=0.068$<br>1b) $r=-0.58, p=0.038^*$<br>2) $r=-0.35, p=0.246$                                                                                                                                                                                                                                                                                                                                                                     |
| Nishihara et al., 2014 <sup>29</sup> | 73±3.2 yrs<br>N=19 (5 F, 14 M)       | Transverse<br>Snap-shot | RF, VI<br>Non-corrected EI                      | <b>RF:</b><br>1) $r=-0.08, p>0.05$<br>2) $r=-0.26, p>0.05$<br>3) $r=-0.18, p>0.05$<br>4) $r=-0.19, p>0.05$                                                                                          | <b>VI:</b><br>1) $r=-0.12, p>0.05$<br>2) $r=0.16, p>0.05$<br>3) $r=-0.04, p>0.05$<br>4) $r=0.06, p>0.05$                                                                                                                                                                                                                                                                                                                                                             |
|                                      |                                      |                         |                                                 | <b>Healthy:</b>                                                                                                                                                                                     | <b>Diabetic:</b>                                                                                                                                                                                                                                                                                                                                                                                                                                                     |
|                                      |                                      |                         |                                                 | <b>RF:</b>                                                                                                                                                                                          | <b>RF:</b>                                                                                                                                                                                                                                                                                                                                                                                                                                                           |
|                                      |                                      |                         |                                                 | 1) $r=-0.31, p<0.001^* \Phi$                                                                                                                                                                        | 1) $r=-0.37, p<0.001^* \Phi$                                                                                                                                                                                                                                                                                                                                                                                                                                         |
|                                      |                                      |                         |                                                 | 2) $r=-0.22, p<0.001^* \Phi$                                                                                                                                                                        | 2) $r=-0.39, p<0.001^* \Phi$                                                                                                                                                                                                                                                                                                                                                                                                                                         |
|                                      |                                      |                         |                                                 | 3) $r=-0.29, p<0.001^* \Phi$                                                                                                                                                                        | 3) $r=-0.29, p=0.005^* \Phi$                                                                                                                                                                                                                                                                                                                                                                                                                                         |
|                                      |                                      |                         |                                                 | 4) $r=-0.31, p<0.001^* \Phi$                                                                                                                                                                        | 4) $r=-0.23, p=0.027^* \Phi$                                                                                                                                                                                                                                                                                                                                                                                                                                         |
|                                      |                                      |                         |                                                 | 5) $r=-0.26, p<0.001^* \Phi$                                                                                                                                                                        | 5) $r=-0.29, p=0.004^* \Phi$                                                                                                                                                                                                                                                                                                                                                                                                                                         |
|                                      |                                      |                         |                                                 | 6) $r=-0.21, p<0.001^* \Phi$                                                                                                                                                                        | 6) $r=-0.23, p=0.080 \Phi$                                                                                                                                                                                                                                                                                                                                                                                                                                           |
|                                      |                                      |                         |                                                 | <b>VI:</b>                                                                                                                                                                                          | <b>VI:</b>                                                                                                                                                                                                                                                                                                                                                                                                                                                           |
|                                      |                                      |                         |                                                 | 1) $r=-0.34, p<0.001^* \Phi$                                                                                                                                                                        | 1) $r=-0.43, p<0.001^* \Phi$                                                                                                                                                                                                                                                                                                                                                                                                                                         |
|                                      |                                      |                         |                                                 | 2) $r=-0.25, p<0.001^* \Phi$                                                                                                                                                                        | 2) $r=-0.40, p<0.001^* \Phi$                                                                                                                                                                                                                                                                                                                                                                                                                                         |
|                                      |                                      |                         |                                                 | 3) $r=-0.26, p<0.001^* \Phi$                                                                                                                                                                        | 3) $r=-0.26, p<0.001^* \Phi$                                                                                                                                                                                                                                                                                                                                                                                                                                         |
|                                      |                                      |                         |                                                 | 4) $r=-0.28, p<0.001^* \Phi$                                                                                                                                                                        | 4) $r=-0.21, p=0.043^* \Phi$                                                                                                                                                                                                                                                                                                                                                                                                                                         |
|                                      |                                      |                         |                                                 | 5) $r=-0.24, p<0.001^* \Phi$                                                                                                                                                                        | 5) $r=-0.29, p=0.003^* \Phi$                                                                                                                                                                                                                                                                                                                                                                                                                                         |
|                                      |                                      |                         |                                                 | 6) $r=-0.20, p<0.001^* \Phi$                                                                                                                                                                        | 6) $r=0.012, p=0.928 \Phi$                                                                                                                                                                                                                                                                                                                                                                                                                                           |
|                                      |                                      |                         |                                                 | <b>Non-corrected EI <math>\Phi</math>:</b>                                                                                                                                                          | <b>Corrected EI:</b>                                                                                                                                                                                                                                                                                                                                                                                                                                                 |
|                                      |                                      |                         |                                                 | <b>MG:</b>                                                                                                                                                                                          | <b>MG:</b>                                                                                                                                                                                                                                                                                                                                                                                                                                                           |
|                                      |                                      |                         |                                                 | 1) $r=-0.10, p=0.734 \Phi$                                                                                                                                                                          | 1) $r=-0.03, p=0.908 \Phi$                                                                                                                                                                                                                                                                                                                                                                                                                                           |
|                                      |                                      |                         |                                                 | 2a) $r=-0.48, p=0.073 \Phi$                                                                                                                                                                         | 2a) $r=-0.49, p=0.065 \Phi$                                                                                                                                                                                                                                                                                                                                                                                                                                          |
|                                      |                                      |                         |                                                 | 2b) $r=-0.31, p=0.261 \Phi$                                                                                                                                                                         | 2b) $r=-0.39, p=0.146 \Phi$                                                                                                                                                                                                                                                                                                                                                                                                                                          |
|                                      |                                      |                         |                                                 | 3) $r=-0.48, p=0.073 \Phi$                                                                                                                                                                          | 3) $r=-0.56, p=0.029^* \Phi$                                                                                                                                                                                                                                                                                                                                                                                                                                         |
|                                      |                                      |                         |                                                 | <b>LG:</b>                                                                                                                                                                                          | <b>LG:</b>                                                                                                                                                                                                                                                                                                                                                                                                                                                           |
|                                      |                                      |                         |                                                 | 1) $r=0.05, p=0.864 \Phi$                                                                                                                                                                           | 1) $r=0.11, p=0.704 \Phi$                                                                                                                                                                                                                                                                                                                                                                                                                                            |
|                                      |                                      |                         |                                                 | 2a) $r=-0.09, p=0.753 \Phi$                                                                                                                                                                         | 2a) $r=-0.20, p=0.482 \Phi$                                                                                                                                                                                                                                                                                                                                                                                                                                          |
|                                      |                                      |                         |                                                 | 2b) $r=-0.04, p=0.902 \Phi$                                                                                                                                                                         | 2b) $r=-0.26, p=0.353 \Phi$                                                                                                                                                                                                                                                                                                                                                                                                                                          |
|                                      |                                      |                         |                                                 | 3) $r=-0.10, p=0.737 \Phi$                                                                                                                                                                          | 3) $r=-0.07, p=0.807 \Phi$                                                                                                                                                                                                                                                                                                                                                                                                                                           |
| Olmos et al., 2019 <sup>31</sup>     | Un-trained<br>65.3±3.2 yrs<br>N=15 M | Transverse<br>Panoramic | MG, LG<br>Corrected and non-corrected $\Phi$ EI | 1) ISO knee extension torque<br>2) CON knee extension ( $60^\circ \cdot s^{-1}$ ) (a: peak torque; b: peak power)<br>3) Grip strength                                                               |                                                                                                                                                                                                                                                                                                                                                                                                                                                                      |
| Olmos et al., 2020 <sup>32</sup>     | 65.3±3.3 yrs<br>N=15 M               | Transverse<br>Snap-shot | avg: MG, LG<br>Corrected EI                     | ISO plantar-flexion<br>1) Absolute torque (a: 50 ms; b: 100 ms; c: 200 ms)<br>2) Normalized torque (a: 50 ms; b: 100 ms; c: 200 ms)<br>3) Specific torque (a: peak; b: 50 ms; c: 100 ms; d: 200 ms) | 1a) $r=-0.30, p>0.05$<br>1b) $r=-0.22, p>0.05$<br>1c) $r=-0.14, p>0.05$<br>2a) $r=-0.44, p<0.05^*$<br>2b) $r=-0.38, p<0.05^*$<br>2c) $r=-0.38, p<0.05^*$<br>3a) $r=0.01, p>0.05$<br>3b) $r=-0.25, p>0.05$<br>3c) $r=-0.19, p>0.05$<br>3d) $r=-0.15, p>0.05$<br>4a) $r=-0.31, p>0.05$<br>4b) $r=0.00, p>0.05$<br>5a) $r=-0.45, p<0.05^*$<br>5b) $r=-0.06, p>0.05$<br>6a) $r=-0.25, p>0.05$<br>6b) $r=-0.06, p>0.05$<br>7a) $r=-0.34, p>0.05$<br>7b) $r=-0.18, p>0.05$ |



|                                      |                                              |                         |                                                              |                                                                                                                                                                                                                                                                                         |                                                                                                                                                                                                                                                                                                                                                                                                                                                                                                                                                                                     |                                                                                                                                                                                                                                                                                                                                                                                                                                                                                                                 |                                                                                                                                                                                                                                                                                                                                                                                                                                                                                                                                                                                                                      |
|--------------------------------------|----------------------------------------------|-------------------------|--------------------------------------------------------------|-----------------------------------------------------------------------------------------------------------------------------------------------------------------------------------------------------------------------------------------------------------------------------------------|-------------------------------------------------------------------------------------------------------------------------------------------------------------------------------------------------------------------------------------------------------------------------------------------------------------------------------------------------------------------------------------------------------------------------------------------------------------------------------------------------------------------------------------------------------------------------------------|-----------------------------------------------------------------------------------------------------------------------------------------------------------------------------------------------------------------------------------------------------------------------------------------------------------------------------------------------------------------------------------------------------------------------------------------------------------------------------------------------------------------|----------------------------------------------------------------------------------------------------------------------------------------------------------------------------------------------------------------------------------------------------------------------------------------------------------------------------------------------------------------------------------------------------------------------------------------------------------------------------------------------------------------------------------------------------------------------------------------------------------------------|
|                                      |                                              |                         |                                                              | 4) Absolute RTD (a: 0-50 ms; b: 100-200 ms)<br>5) Normalized RTD (a: 0-50 ms; b: 100-200 ms)<br>6) Specific RTD (a: 0-50 ms; b: 100-200 ms)<br>7) Absolute impulse (a: 0-50 ms; b: 100-200 ms)                                                                                          |                                                                                                                                                                                                                                                                                                                                                                                                                                                                                                                                                                                     |                                                                                                                                                                                                                                                                                                                                                                                                                                                                                                                 |                                                                                                                                                                                                                                                                                                                                                                                                                                                                                                                                                                                                                      |
| Osawa et al., 2017 <sup>33</sup>     | 88-92 yrs<br>N=108 (45 F, 52 M)              | Transverse<br>Snap-shot | avg: RF, VI<br>Non-corrected EI                              | 1) Timed-up-and-go<br>2) Sit-to-stand×30s                                                                                                                                                                                                                                               |                                                                                                                                                                                                                                                                                                                                                                                                                                                                                                                                                                                     | 1) $r=-0.51, p<0.05^* \chi$<br>2) $r=0.95, p<0.05^* \chi$                                                                                                                                                                                                                                                                                                                                                                                                                                                       |                                                                                                                                                                                                                                                                                                                                                                                                                                                                                                                                                                                                                      |
| Palmer et al., 2020 <sup>34</sup>    | 73±4 yrs<br>N=19 M                           | Transverse<br>Panoramic | avg: BF, semitendinosus, semimembranosus<br>Corrected EI     | 1) Eyes closed postural stability (Sway Index)                                                                                                                                                                                                                                          |                                                                                                                                                                                                                                                                                                                                                                                                                                                                                                                                                                                     | 1) $r=0.47, p=0.040^*$                                                                                                                                                                                                                                                                                                                                                                                                                                                                                          |                                                                                                                                                                                                                                                                                                                                                                                                                                                                                                                                                                                                                      |
| Palmer & Farrow, 2022 <sup>35</sup>  | Healthy<br>67±4 yrs<br>N=20 F                | Transverse<br>Panoramic | VL<br>Corrected & non-corrected EI                           | 1) Timed-up-and-go<br>2) 6 min walk test                                                                                                                                                                                                                                                | <b>Non-corrected EI:</b><br>1) $r=0.55, p=0.012^*$<br>2) $r=-0.46, p=0.040^*$                                                                                                                                                                                                                                                                                                                                                                                                                                                                                                       | <b>Corrected EI:</b><br>1) $r=0.43, p=0.105$<br>2) $r=-0.37, p=0.126$                                                                                                                                                                                                                                                                                                                                                                                                                                           |                                                                                                                                                                                                                                                                                                                                                                                                                                                                                                                                                                                                                      |
| Palmer & Thompson 2017 <sup>36</sup> | Active<br>72±5 yrs<br>N=15 M                 | Transverse<br>Panoramic | avg: BF, semitendinosus, semimembranosus<br>Non-corrected EI | ISO knee flexion torque (a: maximal; b: RFD)                                                                                                                                                                                                                                            |                                                                                                                                                                                                                                                                                                                                                                                                                                                                                                                                                                                     | 1a) $r=-0.81, p<0.05^* \chi$<br>1b) $r=-0.95, p<0.05^* \chi$                                                                                                                                                                                                                                                                                                                                                                                                                                                    |                                                                                                                                                                                                                                                                                                                                                                                                                                                                                                                                                                                                                      |
|                                      |                                              |                         |                                                              |                                                                                                                                                                                                                                                                                         | <b>RF:</b><br>1) $r=-0.41, p=0.038^*$<br>2) $r=-0.55, p=0.001^* \Phi$<br>3) $r=-0.53, p=0.002^* \Phi$<br>4) $r=-0.53, p=0.002^* \Phi$<br>5a) $r=-0.47, p=0.025^*$<br>5b) $r=-0.48, p=0.028^*$<br>6) $r=-0.36, p=0.046^* \Phi$<br>7) $r=-0.11, p=0.16 \Phi$<br>8) $r=-0.17, p=0.34 \Phi$<br><b>LG:</b><br>1) $r=-0.05, p=0.804 \Phi$<br>2) $r=-0.05, p=0.798 \Phi$<br>3) $r=-0.16, p=0.387 \Phi$<br>4) $r=-0.20, p=0.265 \Phi$<br>5a) $r=0.04, p=0.828 \Phi$<br>5b) $r=0.04, p=0.848 \Phi$<br>6) $r=-0.08, p=0.685 \Phi$<br>7) $r=-0.25, p=0.323 \Phi$<br>8) $r=-0.03, p=0.859 \Phi$ | <b>Tibialis anterior:</b><br>1) $r=-0.38, p= \Phi$<br>2) $r=-0.45, p= \Phi$<br>3) $r=-0.53, p= \Phi$<br>4) $r=-0.47, p= \Phi$<br>5a) $r=-0.26, p= \Phi$<br>5b) $r=-0.27, p= \Phi$<br>6) $r=-0.50, p= \Phi$<br>7) $r=-0.25, p= \Phi$<br>8) $r=-0.16, p= \Phi$<br><b>BB:</b><br>1) $r=-0.08, p= \Phi$<br>2) $r=-0.40, p= \Phi$<br>3) $r=-0.44, p= \Phi$<br>4) $r=-0.49, p=0.040^*$<br>5a) $r=-0.11, p= \Phi$<br>5b) $r=-0.14, p= \Phi$<br>6) $r=-0.31, p= \Phi$<br>7) $r=-0.15, p= \Phi$<br>8) $r=-0.08, p= \Phi$ | <b>TB:</b><br>1) $r=-0.28, p=0.035^* \Phi$<br>2) $r=-0.47, p=0.009^* \Phi$<br>3) $r=-0.59, p=0.002^* \Phi$<br>4) $r=-0.57, p=0.007^* \Phi$<br>5a) $r=-0.27, p=0.146 \Phi$<br>5b) $r=-0.27, p=0.139 \Phi$<br>6) $r=-0.53, p=0.004^* \Phi$<br>7) $r=-0.30, p=0.244 \Phi$<br>8) $r=-0.22, p=0.380 \Phi$<br><b>Rectus abdominis:</b><br>1) $r=-0.28, p=0.120 \Phi$<br>2) $r=-0.20, p=0.270 \Phi$<br>3) $r=-0.07, p=0.708 \Phi$<br>4) $r=-0.38, p=0.033^* \Phi$<br>5a) $r=-0.21, p=0.250 \Phi$<br>5b) $r=-0.21, p=0.260 \Phi$<br>6) $r=-0.15, p=0.404 \Phi$<br>7) $r=-0.47, p=0.005^* \Phi$<br>8) $r=-0.30, p=0.097 \Phi$ |
| Paris et al., 2022 <sup>37</sup>     | Community dwelling<br>75.4±7.9 yrs<br>N=32 M | Transverse<br>Snap-shot | RF, LG, TA, BB, TB, rectus abdominis<br>Non-corrected EI     | 1) ISO knee extension torque<br>2) ISO knee flexion torque<br>3) ISO elbow extension torque<br>4) ISO elbow flexion torque<br>5) CON knee extension peak power (a: 60°·s <sup>-1</sup> ; b: 180°·s <sup>-1</sup> )<br>6) Grip strength<br>7) Sit-to-stand×30s<br>8) 6-min walk distance |                                                                                                                                                                                                                                                                                                                                                                                                                                                                                                                                                                                     |                                                                                                                                                                                                                                                                                                                                                                                                                                                                                                                 |                                                                                                                                                                                                                                                                                                                                                                                                                                                                                                                                                                                                                      |
| Rech et al., 2014 <sup>38</sup>      | Healthy, Active<br>70.3±6.2 yrs<br>N=45 F    | Transverse<br>Snap-shot | RF, VI, VL, VM, Quadriceps (avg: RF, VI, VL, VM)             | 1) ISO knee extension torque<br>2) RTD (a: 0-50 ms; b: 0-100 ms; c: 0-250 ms; d: 0-300 ms)<br>3) Grip strength                                                                                                                                                                          | <b>RF:</b><br>1) $r=-0.31, p<0.05^*$<br>2a) $r=-0.27, p>0.05$<br>2b) $r=-0.31, p<0.05^*$                                                                                                                                                                                                                                                                                                                                                                                                                                                                                            | <b>VI:</b><br>1) $r=-0.45, p<0.01^*$<br>2a) $r=-0.20, p>0.05$<br>2b) $r=0.30, p>0.05$<br><b>Quadriceps:</b><br>1) $r=-0.41, p<0.01^*$<br>2a) $r=-0.29, p>0.05$<br>2b) $r=-0.35, p<0.05^*$                                                                                                                                                                                                                                                                                                                       |                                                                                                                                                                                                                                                                                                                                                                                                                                                                                                                                                                                                                      |

|                                      |                                                            |                         |                                                                   |                                                                                                                                                                                                               |                                                                                                                                                                                                                                                           |                                                                                                                                                                                                                                                           |                                                                                                                                                                                                                                                                     |                                 |
|--------------------------------------|------------------------------------------------------------|-------------------------|-------------------------------------------------------------------|---------------------------------------------------------------------------------------------------------------------------------------------------------------------------------------------------------------|-----------------------------------------------------------------------------------------------------------------------------------------------------------------------------------------------------------------------------------------------------------|-----------------------------------------------------------------------------------------------------------------------------------------------------------------------------------------------------------------------------------------------------------|---------------------------------------------------------------------------------------------------------------------------------------------------------------------------------------------------------------------------------------------------------------------|---------------------------------|
|                                      |                                                            |                         | Non-corrected EI                                                  | 4) Sit-to-stand×30s<br>5) Usual gait speed                                                                                                                                                                    | 2c) $r=-0.31, p<0.05^*$<br>2d) $r=-0.31, p<0.05^*$<br>4) $r=-0.51, p<0.01^*$<br>5) $r=-0.35, p<0.05^*$                                                                                                                                                    | 2c) $r=0.36, p<0.05^*$<br>2d) $r=0.38, p<0.05^*$<br>4) $r=-0.28, p>0.05$<br>5) $r=-0.15, p>0.05$                                                                                                                                                          | 2c) $r=-0.39, p<0.05^*$<br>2d) $r=-0.39, p<0.05^*$<br>3) $r=-0.33, p<0.05^*$<br>4) $r=-0.49, p<0.01^*$<br>5) $r=-0.27, p>0.05$                                                                                                                                      |                                 |
|                                      |                                                            |                         |                                                                   |                                                                                                                                                                                                               | <b>VL:</b><br>1) $r=-0.40, p<0.05^*$<br>2a) $r=-0.43, p<0.01^*$<br>2b) $r=-0.44, p<0.01^*$<br>2c) $r=-0.42, p<0.01^*$<br>2d) $r=-0.64, p<0.01^*$<br>4) $r=-0.41, p<0.01^*$<br>5) $r=-0.21, p>0.05$                                                        | <b>VM:</b><br>1) $r=-0.39, p<0.01^*$<br>2a) $r=-0.24, p>0.05$<br>2b) $r=0.30, p>0.05$<br>2c) $r=0.36, p<0.05^*$<br>2d) $r=0.38, p<0.05^*$<br>4) $r=-0.43, p<0.01^*$<br>5) $r=-0.20, p>0.05$                                                               | *Correlations with grip strength not reported for individual quadriceps muscle echogenicity*                                                                                                                                                                        |                                 |
| Stock et al., 2018 <sup>39</sup>     | 74±7 yrs<br>N=23 (12 F, 11 M)                              | Transverse<br>Panoramic | RF<br>Corrected & non-corrected EI                                | 1) ISO knee extensor normalized torque<br>2) RTD 0-200 ms<br>3) 10 m gait speed<br>4) 400 m gait speed                                                                                                        | <b>Non-corrected EI:</b><br>1) $r=-0.12, p=0.593$<br>2) $r=-0.21, p=0.349$<br>3) $r=-0.05, p=0.844$<br>4) $r=0.06, p=0.787$                                                                                                                               |                                                                                                                                                                                                                                                           | <b>Corrected EI:</b><br>1) $r=-0.50, p=0.018^*$<br>2) $r=-0.43, p=0.049^*$<br>3) $r=-0.41, p=0.066$<br>4) $r=-0.41, p=0.065$                                                                                                                                        |                                 |
| Strasser et al., 2013 <sup>40</sup>  | 67.8±4.8 yrs<br>N=26<br>(participant sex not provided)     | Transverse<br>Snap-shot | RF, VL, VI, VM<br>Non-corrected EI                                | ISO knee extension force                                                                                                                                                                                      | <b>RF:</b><br>$r=0.30, p>0.05$                                                                                                                                                                                                                            | <b>VL:</b><br>$r=-0.27, p>0.05$                                                                                                                                                                                                                           | <b>VI:</b><br>$r=-0.34, p>0.05$                                                                                                                                                                                                                                     | <b>VM:</b><br>$r=-0.10, p>0.05$ |
| Taniguchi et al., 2017 <sup>41</sup> | 74.1±4.9 yrs<br>N=179 F                                    | Transverse<br>Snap-shot | RF<br>Non-corrected EI                                            | ISO knee extension force                                                                                                                                                                                      |                                                                                                                                                                                                                                                           |                                                                                                                                                                                                                                                           | $r=-0.32, p<0.05^*$                                                                                                                                                                                                                                                 |                                 |
| Watanabe et al., 2013 <sup>42</sup>  | 74.4±5.9 yrs<br>N=184 M                                    | Transverse<br>Snap-shot | RF<br>Non-corrected EI                                            | ISO knee extension torque                                                                                                                                                                                     |                                                                                                                                                                                                                                                           |                                                                                                                                                                                                                                                           | $r=-0.33, p<0.001^*$                                                                                                                                                                                                                                                |                                 |
| Wearing et al., 2019 <sup>43</sup>   | Nursing Home Residents<br>85.6±7.1 yrs<br>N=30 (23 F, 7 M) | Transverse<br>Snap-shot | RF, BB<br>Non-corrected EI                                        | 1) ISO knee extension torque $\Phi$<br>2) ISO elbow flexion torque $\Phi$<br>3) Grip strength $\Phi$<br>4) Sit-to-stand $\Phi$                                                                                | <b>RF:</b><br>1) $r=-0.16, p=0.434$<br>2) $r=-0.47, p=0.11^*$<br>3) $r=-0.26, p=0.169$<br>4) $r=0.01, p=0.976$                                                                                                                                            |                                                                                                                                                                                                                                                           | <b>BB:</b><br>1) $r=-0.19, p=0.355$<br>2) $r=-0.24, p=0.221$<br>3) $r=-0.16, p=0.411$<br>4) $r=0.15, p=0.598$                                                                                                                                                       |                                 |
| Wilhelm et al., 2014 <sup>44</sup>   | Sedentary Healthy<br>66.1±4.5 yrs<br>N=50 M                | Transverse<br>Snap-shot | RF, VL, VI, VM, Quadriceps (avg: RF, VL, VI, VM)<br>Non-corrected | 1) ISO knee extension torque<br>2) RTD (a: 0-50 ms; b: 0-200 ms)<br>3) CON knee extension (a: 1-RM; b: peak power; c: average power)<br>4) Jump (a: peak power; b: average power)<br>5) Sit-to-stand reps×30s | <b>RF:</b><br>1) $r=-0.46, p<0.05^*$<br>2a) $r=-0.45, p<0.05^*$<br>2b) $r=-0.23, p>0.05$<br>3a) $r=-0.50, p<0.05^*$<br>3b) $r=-0.29, p<0.05^*$<br>3c) $r=-0.29, p<0.05^*$<br>4a) $r=-0.51, p<0.05^*$<br>4b) $r=-0.57, p<0.05^*$<br>5) $r=-0.30, p<0.05^*$ | <b>VI:</b><br>1) $r=-0.48, p<0.05^*$<br>2a) $r=-0.19, p>0.05$<br>2b) $r=-0.28, p<0.05^*$<br>3a) $r=-0.50, p<0.05^*$<br>3b) $r=-0.34, p<0.05^*$<br>3c) $r=-0.43, p<0.05^*$<br>4a) $r=-0.59, p<0.05^*$<br>4b) $r=-0.59, p<0.05^*$<br>5) $r=-0.43, p<0.05^*$ | <b>Quadriceps:</b><br>1) $r=-0.63, p<0.05^*$<br>2a) $r=-0.32, p<0.05^*$<br>2b) $r=-0.50, p<0.05^*$<br>3a) $r=-0.66, p<0.05^*$<br>3b) $r=-0.41, p<0.05^*$<br>3c) $r=-0.50, p<0.05^*$<br>4a) $r=-0.75, p<0.05^*$<br>4b) $r=-0.74, p<0.05^*$<br>5) $r=-0.50, p<0.05^*$ |                                 |
|                                      |                                                            |                         |                                                                   |                                                                                                                                                                                                               | <b>VL:</b><br>1) $r=-0.55, p<0.05^*$<br>2a) $r=-0.30, p<0.05^*$<br>2b) $r=-0.39, p<0.05^*$<br>3a) $r=-0.56, p<0.05^*$<br>3b) $r=-0.36, p<0.05^*$<br>3c) $r=-0.52, p<0.05^*$                                                                               | <b>VM:</b><br>1) $r=-0.64, p<0.05^*$<br>2a) $r=-0.39, p<0.05^*$<br>2b) $r=-0.57, p<0.05^*$<br>3a) $r=-0.66, p<0.05^*$<br>3b) $r=-0.44, p<0.05^*$<br>3c) $r=-0.52, p<0.05^*$                                                                               |                                                                                                                                                                                                                                                                     |                                 |

|                                      |                                                                                                                                                            |                             |                                                                            |                                                                                                                                                                                     |                                                                                                                                                                                                                                                                                                                                                                                                                                                                                                  |                                                                                                                                                                                                                                                                                                                                                                                                                                                                                                     |                                                                                                                                                                                                                                                                                                                                                                                                                                                                                       |
|--------------------------------------|------------------------------------------------------------------------------------------------------------------------------------------------------------|-----------------------------|----------------------------------------------------------------------------|-------------------------------------------------------------------------------------------------------------------------------------------------------------------------------------|--------------------------------------------------------------------------------------------------------------------------------------------------------------------------------------------------------------------------------------------------------------------------------------------------------------------------------------------------------------------------------------------------------------------------------------------------------------------------------------------------|-----------------------------------------------------------------------------------------------------------------------------------------------------------------------------------------------------------------------------------------------------------------------------------------------------------------------------------------------------------------------------------------------------------------------------------------------------------------------------------------------------|---------------------------------------------------------------------------------------------------------------------------------------------------------------------------------------------------------------------------------------------------------------------------------------------------------------------------------------------------------------------------------------------------------------------------------------------------------------------------------------|
|                                      |                                                                                                                                                            |                             |                                                                            |                                                                                                                                                                                     | 4a) $r=-0.73, p<0.05^*$<br>4b) $r=-0.69, p<0.05^*$<br>5) $r=-0.41, p<0.05^*$                                                                                                                                                                                                                                                                                                                                                                                                                     | 4a) $r=-0.64, p<0.05^*$<br>4b) $r=-0.65, p<0.05^*$<br>5) $r=-0.60, p<0.05^*$                                                                                                                                                                                                                                                                                                                                                                                                                        |                                                                                                                                                                                                                                                                                                                                                                                                                                                                                       |
| Wilson et al., 2019 <sup>45</sup>    | Healthy<br>F: 71 yrs; M: 76 yrs<br>N=39 (27 F, 13M)<br>Frail<br>F: 85.5 yrs; M: 77.5 yrs<br>N=31 (17 F, 14 M)                                              | Transverse<br><br>Snap-shot | RF<br><br>Non-corrected EI                                                 | 1) Grip strength (body-mass normalized)<br>2) Walk time<br>3) Short Physical Performance Battery                                                                                    | <b>Healthy (n=31 <math>\Phi</math>):</b><br>1) $r=-0.24, p=0.194 \Phi$<br>2) $r=0.03, p=0.882 \Phi$<br>3) $r=-0.11, p=0.558 \Phi$                                                                                                                                                                                                                                                                                                                                                                | <b>Frail (n=16 <math>\Phi</math>):</b><br>1) $r=0.21, p=0.436 \Phi$<br>2) $r=0.69, p=0.003^* \Phi$<br>3) $r=0.15, p=0.584 \Phi$                                                                                                                                                                                                                                                                                                                                                                     | <b>Combined (n=47 <math>\Phi</math>):</b><br>1) $r=-0.33, p=0.025^* \Phi$<br>2) $r=0.42, p=0.004^* \Phi$<br>3) $r=-0.31, p=0.031^* \Phi$                                                                                                                                                                                                                                                                                                                                              |
| Yamada et al., 2017 <sup>46</sup>    | F: 79.7 $\pm$ 6.9 yrs<br>M: 81.6 $\pm$ 7.4 yrs<br>N=347 (247 F, 100 M)<br>'Normal' n=126<br>'Presarcopenia' n=38<br>'Dynapenia' n=102<br>'Sarcopenia' n=81 | Transverse<br><br>Snap-shot | RF, VI, Quadriceps (avg; RF, VI)<br><br>Non-corrected EI                   | 1) ISO knee extension torque (a: absolute, b: normalized)<br>2) Grip strength<br>3) Timed-up-and-go<br>4) Sit-to-stand $\times$ 5<br>5) Maximal walking speed<br>6) One-leg balance | <b>Female:</b><br><b>RF:</b><br>1a) $r=-0.27, p<0.05^* \chi$<br>1b) $r=-0.94, p<0.05^* \chi$<br>2) $r=-0.88, p<0.05^* \chi$<br>3) $r=-0.91, p<0.05^* \chi$<br>4) $r=-0.91, p<0.05^* \chi$<br>5) $r=-0.94, p<0.05^* \chi$<br>6) $r=-0.73, p<0.05^* \chi$<br><b>VI:</b><br>1a) $r=-0.47, p<0.05^* \chi$<br>1b) $r=-0.86, p<0.05^* \chi$<br>2) $r=-0.58, p<0.05^* \chi$<br>3) $r=-0.76, p<0.05^* \chi$<br>4) $r=-0.75, p<0.05^* \chi$<br>5) $r=-0.86, p<0.05^* \chi$<br>6) $r=-0.36, p<0.05^* \chi$ | <b>Quadriceps:</b><br>1a) $r=-0.13, p<0.05^* \chi$<br>1b) $r=-0.93, p<0.05^* \chi$<br>2) $r=-0.83, p<0.05^* \chi$<br>3) $r=-0.90, p<0.05^* \chi$<br>4) $r=-0.88, p<0.05^* \chi$<br>5) $r=-0.93, p<0.05^* \chi$<br>6) $r=-0.61, p<0.05^* \chi$<br><b>Male:</b><br><b>RF:</b><br>1a) $r=-0.13, p>0.05 \chi$<br>1b) $r=0.95, p<0.05^* \chi$<br>2) $r=-0.81, p<0.05^* \chi$<br>3) $r=-0.91, p<0.05^* \chi$<br>4) $r=-0.92, p<0.05^* \chi$<br>5) $r=-0.95, p<0.05^* \chi$<br>6) $r=-0.73, p<0.05^* \chi$ | <b>VI:</b><br>1a) $r=-0.54, p<0.05^* \chi$<br>1b) $r=-0.86, p<0.05^* \chi$<br>2) $r=-0.31, p<0.05^* \chi$<br>3) $r=-0.74, p<0.05^* \chi$<br>4) $r=-0.75, p<0.05^* \chi$<br>5) $r=-0.86, p<0.05^* \chi$<br>6) $r=-0.41, p<0.05^* \chi$<br><b>Quadriceps:</b><br>1a) $r=-0.37, p<0.05^* \chi$<br>1b) $r=0.94, p<0.05^* \chi$<br>2) $r=-0.71, p<0.05^* \chi$<br>3) $r=-0.81, p<0.05^* \chi$<br>4) $r=-0.90, p<0.05^* \chi$<br>5) $r=-0.94, p<0.05^* \chi$<br>6) $r=-0.61, p<0.05^* \chi$ |
| Yamaguchi et al., 2019 <sup>47</sup> | Community dwelling<br>~75 $\pm$ 9 yrs<br>N=139 (74 F, 65 M)                                                                                                | Transverse<br><br>Snap-shot | Masseter<br><br>Non-corrected EI                                           | 1) Grip strength<br>2) Normal walking speed                                                                                                                                         |                                                                                                                                                                                                                                                                                                                                                                                                                                                                                                  | 1) $r=-0.42, p<0.05^*$<br>2) $r=-0.27, p<0.05^*$                                                                                                                                                                                                                                                                                                                                                                                                                                                    |                                                                                                                                                                                                                                                                                                                                                                                                                                                                                       |
| Yoshiko et al., 2018 <sup>48</sup>   | 78 $\pm$ 8 yrs<br>N=22 (14 F, 8 M)                                                                                                                         | Transverse<br><br>Snap-shot | Appendicular (avg; RF, BF, TB), Axial (multifidus)<br><br>Non-corrected EI | 1) ISO knee extensor torque<br>2) Grip strength<br>3) Timed-up-and-go<br>4) Sit-to-stand<br>5) 5 m normal speed walk<br>6) 5 m maximal speed walk<br>7) Functional reach            | <b>Appendicular:</b><br>1) $r=-0.19, p>0.05$<br>2) $r=-0.11, p>0.05$<br>3) $r=0.38, p>0.05$<br>4) $r=-0.31, p>0.05$<br>5) $r=-0.04, p>0.05$<br>6) $r=-0.16, p>0.05$<br>7) $r=-0.32, p>0.05$                                                                                                                                                                                                                                                                                                      | <b>Axial:</b><br>1) $r=-0.59, p<0.05^*$<br>2) $r=-0.44, p<0.05^*$<br>3) $r=0.57, p<0.05^*$<br>4) $r=-0.50, p<0.05^*$<br>5) $r=-0.27, p>0.05$<br>6) $r=-0.42, p<0.05^*$<br>7) $r=-0.44, p<0.05^*$                                                                                                                                                                                                                                                                                                    |                                                                                                                                                                                                                                                                                                                                                                                                                                                                                       |
| Yoshiko et al., 2019 <sup>49</sup>   | Community dwelling<br>73.7 $\pm$ 2.8 yrs<br>N=209 F & M                                                                                                    | Transverse<br><br>Snap-shot | avg: RF, VL<br><br>Non-corrected EI                                        | 1) Grip strength<br>2) Sit-to-stand<br>3) Timed-up-and-go<br>4) Stand from floor<br>5) Fast walking speed                                                                           | <b>Low EI:</b><br>1) $r=-0.84 \chi$<br>2) $r=-0.99 \chi$<br>3) $r=-0.99 \chi$<br>4) $r=-0.99 \chi$                                                                                                                                                                                                                                                                                                                                                                                               | <b>Medium EI:</b><br>1) $r=-0.93 \chi$<br>2) $r=-0.99 \chi$<br>3) $r=-0.99 \chi$<br>4) $r=-0.99 \chi$                                                                                                                                                                                                                                                                                                                                                                                               | <b>High EI:</b><br>1) $r=-0.97 \chi$<br>2) $r=-0.99 \chi$<br>3) $r=-0.99 \chi$<br>4) $r=-0.99 \chi$                                                                                                                                                                                                                                                                                                                                                                                   |

|  |  |  |  |                                                                                         |                             |                             |                                  |
|--|--|--|--|-----------------------------------------------------------------------------------------|-----------------------------|-----------------------------|----------------------------------|
|  |  |  |  | 6) Normal walking speed                                                                 | 5) $r=-0.99$ $\chi$         | 5) $r=-0.99$ $\chi$         | 5) $r=-0.99$ $\chi$              |
|  |  |  |  | 7) 6-min walk distance                                                                  | 6) $r=-0.99$ $\chi$         | 6) $r=-0.99$ $\chi$         | 6) $r=-0.99$ $\chi$              |
|  |  |  |  |                                                                                         | 7) $r=-0.98$ $\chi$         | 7) $r=-0.98$ $\chi$         | 7) $r=-0.97$ $\chi$              |
|  |  |  |  |                                                                                         | <b>RF:</b>                  | <b>VL:</b>                  | <b>Quadriceps:</b>               |
|  |  |  |  | 1) Grip strength                                                                        | 1) $r=-0.91, p<0.05^* \chi$ | 1) $r=-0.91, p<0.05^* \chi$ | 1) $r=-0.92, p<0.05^* \chi$      |
|  |  |  |  | 2) Sit-to-stand (a: time 10 reps; b: chair rise time; c: ground reaction force; d: RFD) | 2a) $r=-0.12, p>0.05$       | 2a) $r=-0.21, p>0.05$       | 2a) $r=-0.19, p>0.05$            |
|  |  |  |  |                                                                                         | 2b) $r=-0.03, p>0.05$       | 2b) $r=-0.09, p>0.05$       | 2b) $r=-0.07, p>0.05$            |
|  |  |  |  |                                                                                         | 2c) $r=-0.12, p>0.05$       | 2c) $r=-0.15, p>0.05$       | 2c) $r=-0.15, p>0.05$            |
|  |  |  |  |                                                                                         | 2d) $r=-0.09, p>0.05$       | 2d) $r=-0.14, p>0.05$       | 2d) $r=-0.13, p>0.05$            |
|  |  |  |  | 3) 5 m maximal speed walk                                                               | 3) $r=-0.98, p<0.05^* \chi$ | 3) $r=-0.98, p<0.05^* \chi$ | 3) $r=-0.99, p<0.05^* \chi$      |
|  |  |  |  |                                                                                         | <b>Corrected RF:</b>        | <b>Corrected VL:</b>        | <b>Corrected quadriceps:</b>     |
|  |  |  |  |                                                                                         | <b>Tennis</b>               | <b>Tennis</b>               | <b>Tennis</b>                    |
|  |  |  |  |                                                                                         | 1) $r=-0.58, p<0.05^* \chi$ | 1) $r=-0.68, p<0.05^* \chi$ | 1) $r=-0.64, p<0.05^* \chi$      |
|  |  |  |  |                                                                                         | 2) $r=0.93, p<0.05^* \chi$  | 2) $r=0.93, p<0.05^* \chi$  | 2) $r=0.93, p<0.05^* \chi$       |
|  |  |  |  |                                                                                         | <b>Control</b>              | <b>Control</b>              | <b>Control</b>                   |
|  |  |  |  | 1) ISO knee extension torque                                                            | 1) $r=-0.38, p<0.05^* \chi$ | 1) $r=-0.59, p<0.05^* \chi$ | 1) $r=-0.49, p<0.05^* \chi$      |
|  |  |  |  | 2) Sit-to-stand $\times$ 30s                                                            | 2) $r=0.93, p<0.05^* \chi$  | 2) $r=0.91, p<0.05^* \chi$  | 2) $r=0.93, p<0.05^* \chi$       |
|  |  |  |  |                                                                                         | <b>Non-corrected RF:</b>    | <b>Non-corrected VL:</b>    | <b>Non-corrected quadriceps:</b> |
|  |  |  |  |                                                                                         | <b>Tennis</b>               | <b>Tennis</b>               | <b>Tennis</b>                    |
|  |  |  |  |                                                                                         | 1) $r=-0.77, p<0.05^* \chi$ | 1) $r=-0.78, p<0.05^* \chi$ | 1) $r=-0.78, p<0.05^* \chi$      |
|  |  |  |  |                                                                                         | 2) $r=0.78, p<0.05^* \chi$  | 2) $r=0.89, p<0.05^* \chi$  | 2) $r=0.90, p<0.05^* \chi$       |
|  |  |  |  |                                                                                         | <b>Control</b>              | <b>Control</b>              | <b>Control</b>                   |
|  |  |  |  |                                                                                         | 1) $r=-0.69, p<0.05^* \chi$ | 1) $r=-0.76, p<0.05^* \chi$ | 1) $r=-0.73, p<0.05^* \chi$      |
|  |  |  |  |                                                                                         | 2) $r=0.89, p<0.05^* \chi$  | 2) $r=0.87, p<0.05^* \chi$  | 2) $r=0.89, p<0.05^* \chi$       |

Abbreviations:  $\Delta$ =change, yrs=years old, m=meter, min=minute, s=second, ISO=isometric, CON=concentric, BB=biceps brachii, TB=triceps brachii, RF=rectus femoris, MG=medial gastrocnemius, LG=lateral gastrocnemius, VL=vastus lateralis, VI=vastus intermedius, VM=vastus medialis, UL=upper limb, LL=lower limb, EI=echo intensity, RFD=rate of force development, RTD=rate of torque development, RVD=rate of velocity development, TA=tibialis anterior.

Data are presented as mean  $\pm$  standard deviation. \*=statistically significant ( $p<0.05$ ) correlation.  $\Phi$ =Unpublished data provided by authors upon request.  $\chi$ =calculated from mean, SD and n data ( $p$ -values are based on 95% confidence intervals).

248

249

250

251 Scans were collected in the transverse plane in 46 studies,<sup>7,12,14–17,19–24,26–30,32–36,38–44,46–62</sup>  
252 with four obtaining sagittal plane images,<sup>11,18,37,44</sup> one study utilized both transverse and sagittal  
253 scanning planes.<sup>44</sup> Snap-shot images were collected in 39 studies,<sup>7,11,12,14,17,18,20–24,26–29,32,33,35–42,44–</sup>  
254 <sup>47,49,53,55–62</sup> with 11 using panoramic/extended field-of-view technologies.<sup>15,16,19,30,34,43,48,50–52,54</sup> The  
255 scanning plane and scanning method could not be deduced in a single study.<sup>31</sup> Non-corrected  
256 echogenicity was used in 49 studies,<sup>7,11,12,14–20,22–24,26–49,51–62</sup> while subcutaneous fat-correction was  
257 reported or obtained in 12 studies.<sup>15,16,18,19,21,30,40,48,50,51,54,59</sup> Both non-corrected and corrected  
258 values and/or correlations were found or obtained from 10 studies.<sup>15,16,18,19,30,40,48,51,54,59</sup>

259  
260 The rectus femoris was the most common (n=33) isolated muscle included in  
261 correlations,<sup>7,11,12,14,17,18,20,22–24,28,29,31–37,39–41,43,46,47,53–57,59–62</sup> followed by the vastus lateralis  
262 (n=11),<sup>12,28,29,36,38,39,51,53,56,59,62</sup> medial gastrocnemius (n=7),<sup>15,16,32,33,36,40,48</sup> vastus intermedius  
263 (n=7),<sup>12,20,41,47,53,56,57</sup> lateral gastrocnemius (n=4),<sup>15,22,40,48</sup> biceps brachii (n=4),<sup>22,23,32,33</sup> vastus  
264 medialis (n=3),<sup>12,53,56</sup> tibialis anterior (n=3),<sup>22,36,42</sup> and triceps brachii (n=3).<sup>22,32,33</sup> Single studies  
265 reported correlations with the multifidus,<sup>44</sup> erector spinae,<sup>44</sup> gluteus medius,<sup>38</sup> masseter,<sup>58</sup> psoas  
266 major,<sup>44</sup> or rectus abdominis<sup>22</sup> muscles. Several studies also pooled multiple muscles including all  
267 four quadriceps muscles (n=4),<sup>27,41,53,56</sup> rectus femoris and vastus lateralis (n=7),<sup>28–30,57,59,61,62</sup>  
268 rectus femoris and vastus intermedius (n=2),<sup>49,57</sup> biceps brachii and the wrist flexors (n=1),<sup>45</sup> lateral  
269 gastrocnemius and soleus (n=1),<sup>26</sup> rectus femoris, biceps femoris and triceps brachii (n=1),<sup>60</sup> rectus  
270 femoris, vastus intermedius, medial gastrocnemius and lateral gastrocnemius (n=1),<sup>19</sup> and rectus  
271 femoris, vastus lateralis, tibialis anterior and medial gastrocnemius (n=1).<sup>45</sup>

272

273 The most common functional test was peak force or torque during isometric knee extension  
274 (n=22)<sup>7,12,14,17,18,20,22,23,27,31,35,39,43,47,48,53–57,59,60</sup> or flexion (n=2),<sup>22,52</sup> followed by measures of grip  
275 strength (n=20),<sup>11,14,20,22–24,28,32,33,37,40,45,46,48,53,57,58,60–62</sup> walking speed  
276 (n=16),<sup>14,17,20,32,33,36,40,44,45,47,53,54,57,58,60,61</sup> sit-to-stand (n=16),<sup>22,23,28,29,38,40,41,43,49,53,56,57,59–62</sup> timed  
277 up-and-go (n=10),<sup>17,20,38,45,47,49,51,57,60,61</sup> concentric knee extension force or power,  
278 (n=8)<sup>11,22,30,31,39,45,48,56</sup> isometric or concentric plantar-flexion (n=5) strength, power or velocity,  
279 <sup>15,16,19,26,48</sup> single leg balance or posture (n=5),<sup>17,20,38,50,57</sup> isometric elbow flexion (n=2)<sup>22,23</sup> or  
280 extension (n=1),<sup>22</sup> sit-up (n=2),<sup>28,29</sup> supine to stand (n=2),<sup>28,29</sup> ‘functional reach’ score (n=2),<sup>40,60</sup>  
281 or short physical performance battery (n=2).<sup>24,45</sup> Single studies reported correlations between  
282 echogenicity and the ‘functional independence measure gait score’,<sup>27</sup> heel-rise repetitions,<sup>40</sup> dorsi-  
283 flexion,<sup>42</sup> or hip flexion force,<sup>34</sup> jump height or power,<sup>56</sup> knee extension fatigue,<sup>30</sup> stand from  
284 floor,<sup>61</sup> or the Tinetti performance test.<sup>45</sup> Ten studies included at least one measure of rapid  
285 force/torque/velocity production.<sup>16,19,21,34,39,52–54,56,62</sup>

286

### 287 3.2. Knee extension strength

288 Twenty studies, including 2924 participants, reported or later provided correlations  
289 between quadriceps echogenicity and maximal isometric or concentric knee extension force or  
290 torque.<sup>7,12,17,18,20,22,23,23,27,30,31,35,37,39,43,45,47,54–56</sup> Meta-analysis determined a moderate ( $r=-0.36$   
291 [95%CI: -0.38 to -0.32],  $p<0.001$ ) negative correlation between quadriceps echogenicity and knee  
292 extension strength in older adults (**Figure 2A**). Sub-group analyses revealed no significant  
293 differences between correlations between knee extension strength and individual quadriceps  
294 muscles (**Figure 2B**). However, despite relatively few studies for comparison, the vastus medialis  
295 muscle holds larger correlations ( $r=-0.41$  [95%CI: -0.65 to -0.10],  $p=0.01$ ) when compared to

296 vastus intermedius ( $r=-0.35$  [95%CI: -0.41 to -0.30],  $p<0.001$ ), vastus lateralis ( $r=-0.30$  [95%CI:  
 297 -0.55 to -0.02],  $p=0.04$ ), or rectus femoris ( $r=-0.34$  [95%CI: -0.37 to -0.30],  $p<0.001$ ) muscles.  
 298 Interestingly, combining the rectus femoris with vastus lateralis echogenicity ( $r=-0.60$  [95%CI: -  
 299 0.77 to -0.36],  $p<0.001$ ) outperformed combining all four quadriceps muscles ( $r=-0.48$  [95%CI: -  
 300 0.72 to -0.13],  $p=0.01$ ). Additionally, the rectus femoris and vastus intermedius combination  
 301 (Fisher's Z lower 95%CI: -0.38) was superior to rectus femoris in isolation (Fisher's Z upper  
 302 95%CI: -0.39).  
 303

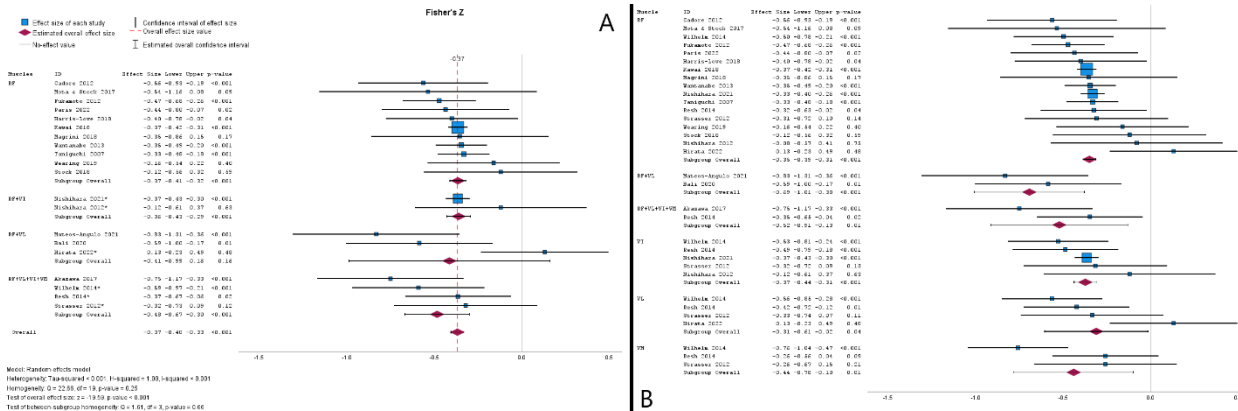

304  
 305 **Figure 2.** Meta-analytical forest plot of Fisher's Z correlations between quadriceps echogenicity  
 306 and maximal isometric or concentric force or torque (**panel A**) with sub-group analysis for  
 307 individual quadriceps muscles (**panel B**). \*=studies where multiple muscles and correlations were  
 308 averaged.

310 **3.3. Grip strength**

311 Sixteen studies, including 1912 participants, reported or provided correlations between  
 312 muscle echogenicity and grip strength.<sup>11,14,20,22–24,28,32,33,37,40,45,46,48,53,58</sup> Meta-analysis determined  
 313 a moderate ( $r=-0.31$  [95%CI: -0.37 to -0.24],  $p<0.001$ ) negative correlation between echogenicity  
 314 and grip strength (**Figure 3**). No significant differences were found when comparing correlations  
 315 between different individual muscles via sub-group analyses.

It is made available under a [CC-BY-NC-ND 4.0 International license](https://creativecommons.org/licenses/by-nc-nd/4.0/).

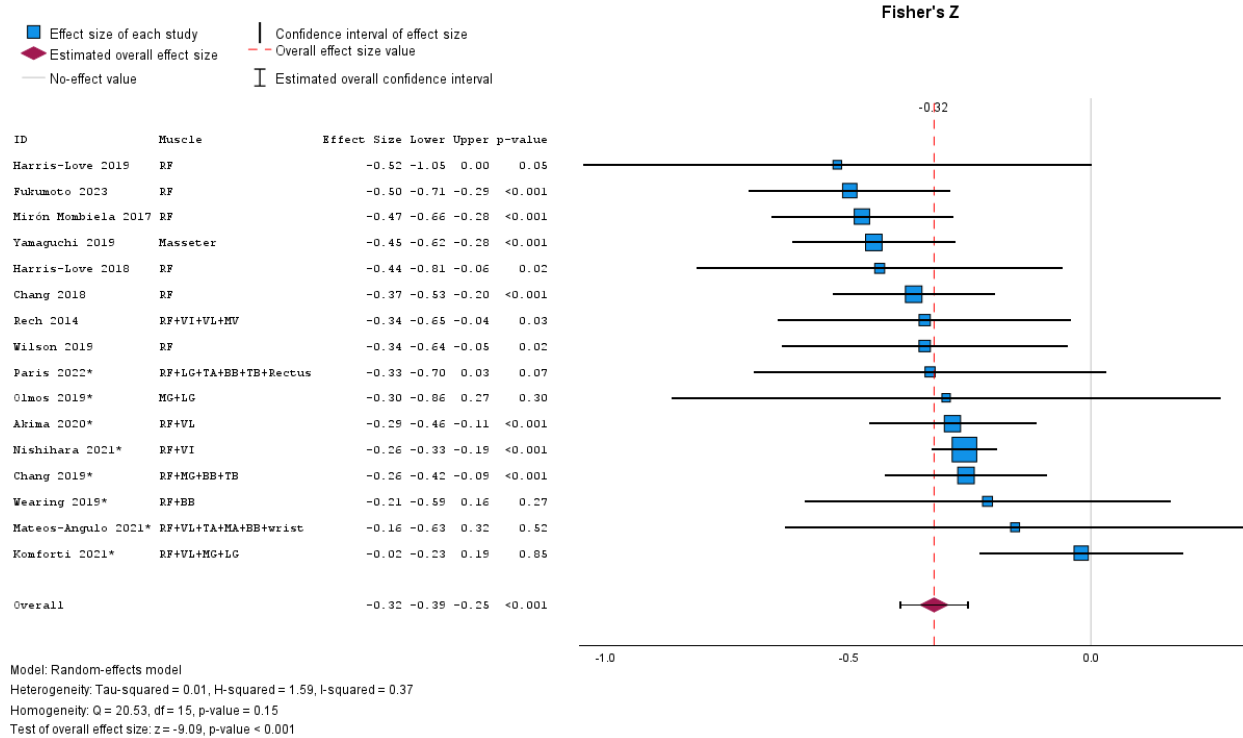

316  
317 **Figure 3.** Meta-analytical forest plot of Fisher’s Z correlations between echogenicity and grip  
318 strength. \*=studies where multiple muscles and correlations were averaged.  
319

### 320 3.4. Walking speed

321 Within study comparison demonstrated that preferred or normal walking speed ( $r=-0.11$ .  
322 range: -0.46 to 0.17) held smaller correlations ( $p=0.015$ ) with muscle echogenicity when compared  
323 to maximal walking speed ( $r=-0.17$ , range: -0.51 to 0.15).<sup>20,36,40,44,47,60,61</sup> Therefore, the meta-  
324 analysis only included maximal walking speed where possible. The meta-analysis included 17  
325 studies, including 2972 participants.<sup>14,17,20,22,24,28,29,33,36,40,44,45,51,53,54,58,60</sup> Meta-analysis determined  
326 a small ( $r=-0.23$  [95% CI: -0.29 to -0.16],  $p<0.001$ ) negative correlation between echogenicity and  
327 walking speed (**Figure 4**). Not enough between-study consistency existed to examine sub-analysis  
328 of individual muscle groups.



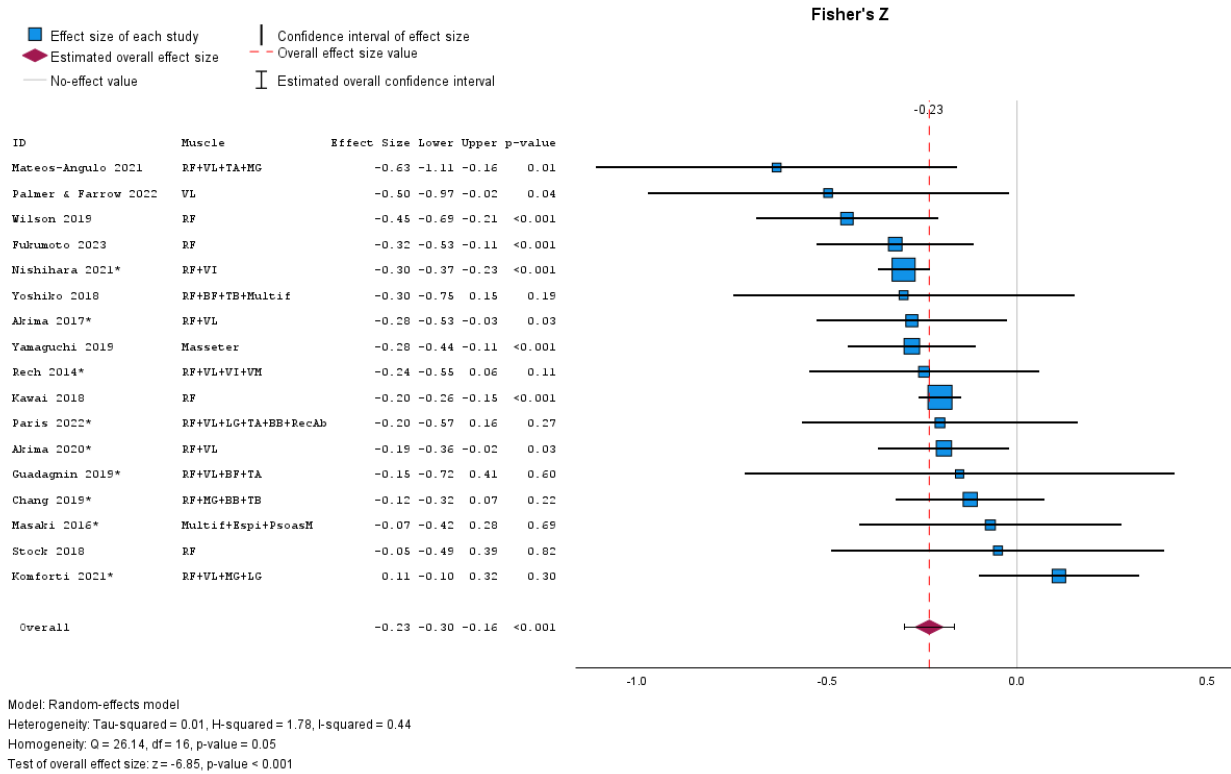

329  
330 **Figure 4.** Meta-analytical forest plot of Fisher's Z correlations between echogenicity and walking  
331 speed. \*=studies where multiple muscles and correlations were averaged.  
332

### 333 3.5. Sit-to-stand

334 A total of 12 studies with 666 elderly participants were included in the meta-analysis  
335 determining a moderate ( $r=-0.34$  [95%CI: -0.44 to -0.23],  $p<0.001$ ) negative correlation between  
336 echogenicity and sit-to-stand performance (**Figure 5A**).<sup>22,23,28,29,38,40,41,43,53,56,60,62</sup> When examining  
337 individual muscles (**Figure 5B**), the combination of all four quadriceps muscles ( $r=-0.61$  [95%CI:  
338 -0.74 to -0.43],  $p<0.001$ ) appears to have superior correlations when compared to rectus femoris  
339 ( $r=-0.25$  [95%CI: -0.37 to -0.14],  $p<0.001$ ), vastus lateralis ( $r=-0.38$  [95%CI: -0.51 to -0.21],  
340  $p<0.001$ ), rectus femoris with vastus lateralis ( $r=-0.28$  [95%CI: -0.45 to -0.10],  $p=0.03$ ), or vastus  
341 intermedius ( $r=-0.45$  [95%CI: -0.70 to -0.10],  $p<0.001$ ). While only incorporating two studies,  
342 vastus medialis ( $r=-0.55$  [95%CI: -0.73 to -0.37],  $p<0.001$ ) outperformed all other individual  
343 quadriceps muscles when correlating to sit-to-stand performance.

344

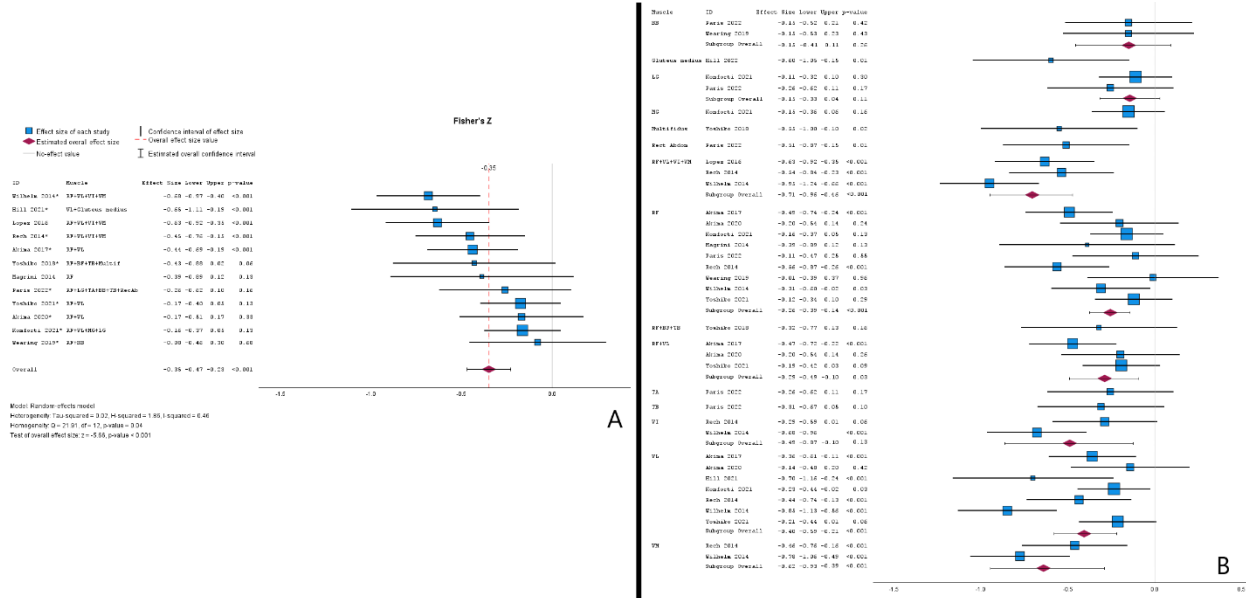

345

346

347

348

349

**Figure 5.** Meta-analytical forest plot of Fisher’s Z correlations between quadriceps echogenicity and sit-to-stand performance (**panel A**) with sub-group analysis for individual quadriceps muscles (**panel B**). \*=studies where multiple muscles and correlations were averaged.

350 **3.6. Timed up-and-go**

351 Seven studies, incorporating 2172 participants, were included in a meta-analysis. The  
 352 meta-analysis determined a small ( $r=-0.26$  [95% CI: -0.35 to -0.18],  $p<0.001$ ) negative correlation  
 353 between echogenicity and timed up-and-go performance (**Figure 6**).<sup>17,20,38,45,47,51,60</sup> Sub-group  
 354 analyses could not be confidently performed. However, it seems plausible that vastus lateralis ( $r=-$   
 355 0.55 to -0.51) echogenicity is a better predictor of timed up-and-go performance than the rectus  
 356 femoris ( $r=-0.29$  to -0.19) or vastus intermedius ( $r=-0.26$  to 0.06). Interestingly, the largest single  
 357 correlations with timed up-and-go performance were multifidus ( $r=-0.57$ ) and gluteus medius ( $r=-$   
 358 0.49) echogenicity.

It is made available under a [CC-BY-NC-ND 4.0 International license](https://creativecommons.org/licenses/by-nc-nd/4.0/).

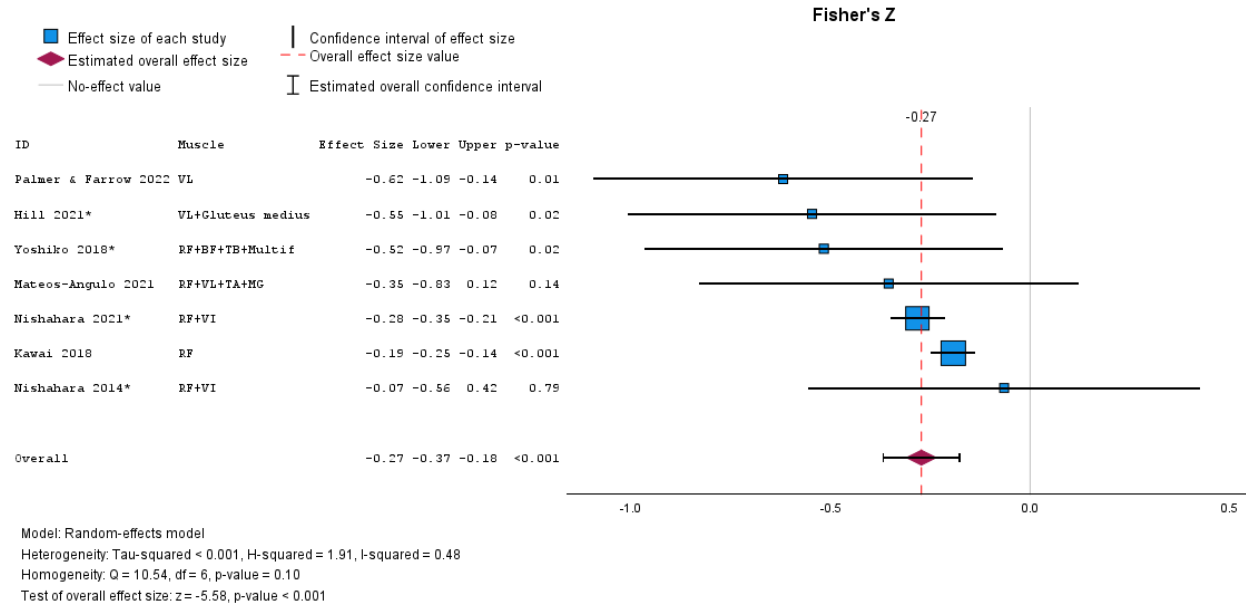

359  
360 **Figure 6.** Meta-analytical forest plot of Fisher’s Z correlations between echogenicity and timed  
361 up-and-go performance. \*=studies where multiple muscles and correlations were averaged.  
362

363 *3.7. Rapid force production*

364 Ten studies report measures of rapid force,<sup>16,52,62</sup> torque,<sup>21,34,53,54,56</sup> or velocity<sup>19,39</sup>  
365 development. Correlations with echogenicity were generally small and highly variable ( $r=-0.15$ ;  
366 range: -0.42 to 0.25). Methods were too variable for meta-analyses to be confidently performed.

367  
368 *3.8. Additional considerations*

369 Other physical performance measures (e.g., sit-up, functional batteries, balance tasks) did  
370 not exist in large enough quantities to warrant data pooling. However, correlations were trivial to  
371 large ( $r=-0.58$  to 0.23) and highly variable. Funnel plots illustrate minimal risk of publication bias

372 **Figure 7.**

373

It is made available under a [CC-BY-NC-ND 4.0 International license](https://creativecommons.org/licenses/by-nc-nd/4.0/).

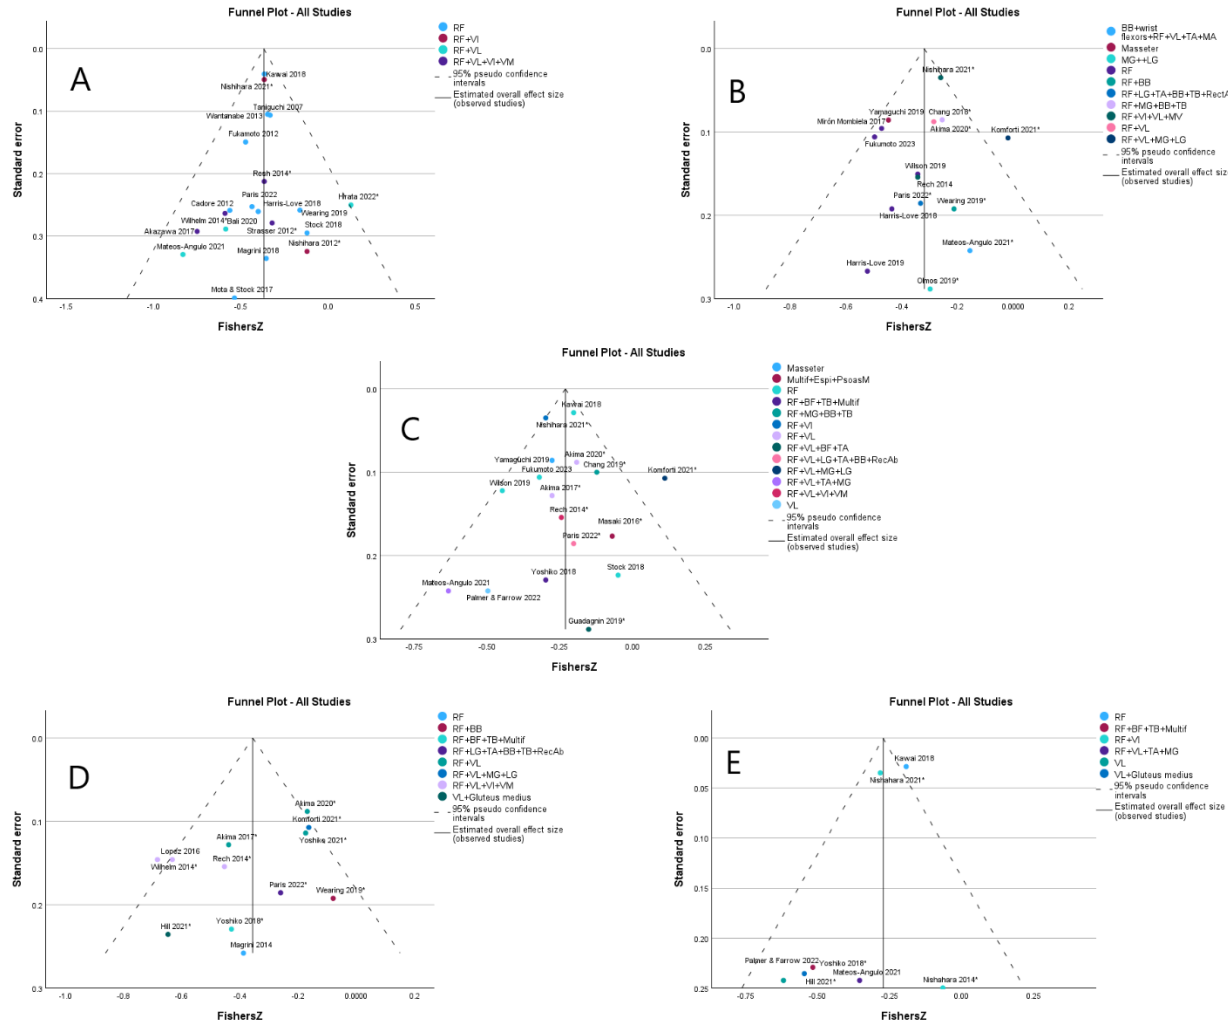

374  
 375 **Figure 7.** Funnel plots representing echogenicity correlations with knee extension strength (panel  
 376 A), grip strength (panel B), walking speed (panel C), sit-to-stand (panel D), and timed up-and-go  
 377 (panel E) performances, respectively  
 378

379 **4. Discussion**

380 Early identification of skeletal muscle weakness or dysfunction is imperative for early  
 381 diagnosis and treatment for older individuals. Ultrasound-derived echogenicity is one potential  
 382 method to detect and track changes in muscle composition and loss of function. Therefore, this  
 383 systematic review with meta-analyses aimed to compile available research that evaluates the  
 384 relationships between muscle echogenicity and measures of muscle functional assessments in older  
 385 adults. The meta-analyses, consisting of 7-20 studies, consistently found moderate, negative

386 relationships, demonstrating higher measures of echogenicity (lower muscle quality) associated  
387 with lower physical function. However, results were not uniform across all studies.

388

389 This study's primary and largest meta-analysis examined the relationships between quadriceps  
390 muscle echogenicity and knee extension strength. This pooled analysis included 20 studies and 2924 older  
391 adults<sup>7,12,17,18,20,22,23,23,27,30,31,35,37,39,43,45,47,54-56</sup> and demonstrated a modest, negative relationship, with  
392 relatively narrow confidence intervals ( $r=-0.36$  [95%CI: -0.38, -0.32],  $p<0.001$ ). Quadriceps strength has  
393 demonstrated moderate to strong relationships to functional tasks,<sup>23</sup> with lower quadriceps strength  
394 increasing the odds (OR=3 [95% CI, 1.78 to 5.05]) of falls within older adults.<sup>64</sup> Further, quadriceps strength  
395 relates to mortality, demonstrating a high utility for patient prognoses.<sup>65</sup> The current review demonstrated  
396 that skeletal muscle quality quantified through ultrasound echogenicity might explain a relatively small  
397 variance of knee extensor torque. Prior research has found that echogenicity and muscle volume predict  
398 greater variances of knee extensor torque compared to muscle volume alone,<sup>66</sup> which may suggest that  
399 morphological components of skeletal tissue contribute to the muscle's functionality. The small to moderate  
400 pooled estimates within the current review may support echogenicity as a supplementary outcome to muscle  
401 volume in predicting strength or function. However, quadriceps echogenicity may be an appropriate  
402 surrogate to quantify knee extensor torque and total-body physical function as a stand-alone measure. The  
403 consistent findings of negative relationships may propose the utility of such measures within a screening  
404 protocol in a battery of other assessments. Greater intramuscular adipose tissue is associated with an 8%  
405 risk of mortality<sup>67</sup> and has thus been suggested as a time-efficient and noninvasive sarcopenia screen.<sup>68</sup>  
406 Finally, it should be noted that sub-analysis, which including a limited number of studies excluding the  
407 rectus femoris, demonstrated relatively minimal differences in correlations with knee extensor strength over  
408 different quadriceps muscles. However, the studies combining multiple quadriceps muscles (rectus  
409 femoris+vastus lateralis; rectus femoris+vastus lateralis+vastus intermedius+vastus medialis) demonstrated  
410 the strongest correlations.

411

412 Like quadriceps strength, the meta-analysis of grip strength demonstrated a modest negative  
413 correlation ( $r=-0.31$  [95%CI: -0.37 to -0.24],  $p<0.001$ ) with echogenicity. When examining non-meta  
414 data, lower tissue quality in other muscle groups was also negatively related to knee extensor torque. For  
415 example, the multifidus and gastrocnemius echogenicity demonstrated weak to moderate negative  
416 relationships to knee extensor torque.<sup>60</sup> Prior research has shown lower muscle quality present across  
417 multiple muscle groups with older individuals – suggesting global changes in muscle morphology, a finding  
418 supported by the present meta-analyses. Mateos-Angulo et al.<sup>45</sup> found that the scanning location for muscle  
419 quality is important in collecting different strength measures. Muscle echogenicity contained in the upper  
420 extremity (biceps brachii and superficial wrist flexors) and lower extremity (rectus femoris, vastus lateralis,  
421 medial gastrocnemius, and tibialis anterior) were found to have moderate relationships to knee extensor  
422 torque, but not to hand grip strength.<sup>45</sup> Hand-grip strength is a commonly collected measure within older  
423 adults to screen for sarcopenia.<sup>1,69</sup> The current review demonstrates its relationship to skeletal muscle  
424 quality to be inconsistent across and within muscle groups ( $r=-0.52$  to  $-0.02$ ). Chang et al.<sup>32</sup> found  
425 significant, negative relationships to hand grip strength when muscle quality was assessed within the biceps  
426 brachii, triceps brachii, and rectus femoris, but not to the medial gastrocnemius. Yoshiko et al.<sup>60</sup> averaged  
427 four scanning locations (rectus femoris, biceps femoris, and triceps brachii) and found no significant  
428 relationships to hand-grip strength.

429

430 Relationships to dynamic performance (walking speed:  $r=-0.23$  [95%CI: -0.29 to -0.16],  
431  $p<0.001$ ; sit-to-stand:  $r=-0.34$  [95%CI: -0.44 to -0.23],  $p<0.001$ ; timed up-and-go:  $r=-0.26$   
432 [95%CI: -0.35 to -0.18],  $p<0.001$ ) were similar, but slightly weaker and less homogenous than  
433 quadriceps strength. Intermuscular adipose fat has been demonstrated to be associated with annual declines  
434 in gait speed, a relationship independent from total body adiposity in men.<sup>70</sup> Maximal gait speed in older  
435 adults are influenced by numerous neuromuscular factors, which may limit the predictability of such task

436 from quality assessment of a single muscle.<sup>71</sup> Also, the number of individual muscles needed to be recruited  
437 and activated for walking tasks may explain the inconsistencies or lack of relationships between a single  
438 muscle group and gait speed. Nevertheless, the relatively similar between-variable pooled correlations,  
439 combined with the sub-analyses, suggest that muscle echogenicity is systemic; thus, poor muscle quality in  
440 one muscle is likely representative of total-body skeletal muscle composition.

441  
442 In addition to strength, the current review extracted ten studies that assessed the relationship  
443 between muscle echogenicity and rapid force, torque, or velocity production.<sup>16,19,21,34,39,52–54,56,62</sup> Rate of  
444 force/torque/velocity development quantifies the time frame at which these qualities are expressed and often  
445 hold stronger relationships to sport-specific and functional daily tasks than strength alone.<sup>72,73</sup> Rapid  
446 strength expression is limited in older, active men compared to a younger cohort.<sup>74</sup> Negative, but highly  
447 variable relationships were observed between muscle echogenicity and rapid force expression, though the  
448 methods by which rapid force expression was measured may influence these clinical relationships. Olmos  
449 et al.<sup>21</sup> assessed the rate of torque development in terms of absolute (non-normalized), normalized  
450 (normalized to peak torque), or specific (normalized to muscle cross-sectional area) and only found weak,  
451 negative relationships to exist between gastrocnemius echogenicity and plantar-flexion rate of torque  
452 development when normalized to peak torque.<sup>21</sup> Additionally, the time domain in calculating rapid force  
453 expression may contribute to the relationships to clinical outcomes. Studies extracted in this review  
454 calculated rapid force from 0-50 ms to 0-200 ms, demonstrating weak to moderate relationships to  
455 echogenicity with each.<sup>21,56</sup>

456

#### 457 *4.1. Limitations and future research directions*

458 While a substantial number of studies, participants, muscles, functional tests, and analyses  
459 were examined, this systematic review with meta-analyses has limitations. While this review  
460 focused on older adults, ultrasonic muscle quality and composition estimations are potentially

461 valuable to various populations, including development through adulthood, athletes, and people  
462 with neuromuscular conditions. Due to general differences in muscle fiber type and body fat  
463 amount and distribution, the effects of sex on the relationships between skeletal muscle  
464 echogenicity is another exciting topic, especially considering the lack of studies reporting  
465 correlations with subcutaneous fat thickness corrected values despite correction resulting in greater  
466 inter-session reliability.<sup>75</sup> While one of the strengths of meta-analysis is to balance out studies with  
467 extreme findings, it should be noted that Kawai et al.,<sup>17</sup> (N=1239), and Nishihara et al.,<sup>20</sup> (N=831)  
468 included the largest sample sizes by a substantial magnitude. Thus, these two studies affected the  
469 knee extension strength, grip strength (only Kawai et al., 2018), walking speed, and timed up-and-  
470 go analyses more than others. However, these two studies were never ‘outliers’ compared to the  
471 other relevant studies. Finally, this review included only cross-sectional correlational studies.  
472 Therefore, future meta-analytical reviews may wish to examine the relationships between  
473 longitudinal changes in echogenicity and physical function.

474

## 475 **5. Conclusions**

476 The results of this systematic review with meta-analyses demonstrate a consistent yet  
477 modest association between skeletal muscle echogenicity and physical function in ageing adults.  
478 Additionally, sub-analyses show minimal between-muscle differences in correlations between  
479 echogenicity and physical function, suggesting that ultrasound-estimated muscle quality and  
480 composition are systemic. However, including multiple muscles tends to improve the predictive  
481 ability of muscle strength measures. Researchers and practitioners should, therefore, understand  
482 echogenicity screenings for muscle-related issues should be supplemented with additional  
483 assessments, such as muscle thickness. Additionally, while researchers could consider combining



484 multiple muscles to improve correlational strength, time-poor practitioners can choose to scan a  
485 single, easily accessible muscle to estimate total body muscle composition.

486

#### 487 **Acknowledgements**

488 We thank Dr's Daisy Wilson, Eric Ryan, Garret Hester, Gena Gerstner, Hisashi Kawai,  
489 Jacob Mota, Julia Wearing, Matt Stock, Michael Paris, and Yoshihiro Fukumoto for providing  
490 additional findings from their publications.

491

#### 492 **Authors' contributions**

493 MHL provided salary support for all other authors. MHL and SGB conceived the initial  
494 topic. SGB, KLB and DJO performed literature searches and study evaluations. DJO, SGB, and  
495 KLB extracted the study data. DJO performed the statistical analyses and created the figures. DJO  
496 and SGB wrote the introduction and discussion sections, while DJO wrote the abstract, methods,  
497 and results. All authors edited and approved the submitted manuscript.

498

#### 499 **Conflict of interest**

500 None of the authors have any conflicts of interest to disclose.

501 **References**

- 502 1. Cruz-Jentoft, A. J. *et al.* Sarcopenia: Revised European consensus on definition and diagnosis.  
503 *Age Ageing* **48**, 601–601 (2019).
- 504 2. Bijlsma, A. Y. *et al.* Defining sarcopenia: The impact of different diagnostic criteria on the  
505 prevalence of sarcopenia in a large middle aged cohort. *Age* **35**, 871–881 (2013).
- 506 3. Cruz-Jentoft, A. J. *et al.* Prevalence of and interventions for sarcopenia in ageing adults: A  
507 systematic review. Report of the International Sarcopenia Initiative (EWGSOP and IWGS). *Age*  
508 *Ageing* **43**, 748–759 (2014).
- 509 4. Malmstrom, T. K., Miller, D. K., Simonsick, E. M., Ferrucci, L. & Morley, J. E. SARC-F: a  
510 symptom score to predict persons with sarcopenia at risk for poor functional outcomes: SARC-  
511 F. *Journal of Cachexia, Sarcopenia and Muscle* **7**, 28–36 (2016).
- 512 5. Akazawa, N., Okawa, N., Tamura, K. & Moriyama, H. Relationships between intramuscular  
513 fat, muscle strength and gait independence in older women: A cross-sectional study:  
514 Intramuscular fat in older women. *Geriatr Gerontol Int* **17**, 1683–1688 (2017).
- 515 6. Isaka, M. *et al.* The usefulness of an alternative diagnostic method for sarcopenia using  
516 thickness and echo intensity of lower leg muscles in older males. *J Am Med Dir Assoc* **20**,  
517 1185.e1-1185.e8 (2019).
- 518 7. Watanabe, Y. *et al.* Echo intensity obtained from ultrasonography images reflecting muscle  
519 strength in elderly men. *Clin Interv Aging* **9**, 993 (2013) doi:10.2147/CIA.S47263.
- 520 8. Engelke, K. *et al.* The effect of ageing on fat infiltration of thigh and paraspinal muscles in men.  
521 *Aging Clin Exp Res* **34**, 2089–2098 (2022).
- 522 9. Wood, L. K. *et al.* Intrinsic stiffness of extracellular matrix increases with age in skeletal  
523 muscles of mice. *Journal of Applied Physiology* **117**, 363–369 (2014).

- 524 10. Wilson, D., Breen, L., Lord, J. M. & Sapey, E. The challenges of muscle biopsy in a  
525 community based geriatric population. *BMC Res Notes* **11**, 830 (2018).
- 526 11. Harris-Love, M. *et al.* The comparative associations of ultrasound and computed  
527 tomography estimates of muscle quality with physical performance and metabolic parameters  
528 in older men. *J Clin Med* **7**, 340 (2018).
- 529 12. Strasser, E. M., Draskovits, T., Praschak, M., Quittan, M. & Graf, A. Association between  
530 ultrasound measurements of muscle thickness, pennation angle, echogenicity and skeletal  
531 muscle strength in the elderly. *Age* **35**, 2377–2388 (2013).
- 532 13. Cesari, M. *et al.* Sarcopenia, obesity, and inflammation—results from the Trial of  
533 Angiotensin Converting Enzyme Inhibition and Novel Cardiovascular Risk Factors study. *Am*  
534 *J Clin Nutr* **82**, 428–434 (2005).
- 535 14. Fukumoto, Y. *et al.* Association of Regional Muscle Thickness and Echo Intensity with  
536 Muscle Volume, Intramuscular Adipose Tissue, and Strength of the Quadriceps Femoris. *CIA*  
537 **Volume 18**, 1513–1521 (2023).
- 538 15. Gerstner, G. R., Giuliani, H. K., Mota, J. A. & Ryan, E. D. Age-related reductions in muscle  
539 quality influence the relative differences in strength and power. *Exp Gerontol* **99**, 27–34 (2017).
- 540 16. Gerstner, G. R. *et al.* Neural and muscular contributions to the age-related reductions in  
541 rapid strength. *Med Sci Sports Exer* **49**, 1331–1339 (2017).
- 542 17. Kawai, H. *et al.* Morphological and qualitative characteristics of the quadriceps muscle of  
543 community-dwelling older adults based on ultrasound imaging: Classification using latent class  
544 analysis. *Aging Clin Exp Res* **30**, 283–291 (2018).
- 545 18. Mota, J. A. & Stock, M. S. Rectus femoris echo intensity correlates with muscle strength,  
546 but not endurance, in younger and older men. *Ultrasound Med Biol* **43**, 1651–1657 (2017).

- 547 19. Mota, J. A., Giuliani, H. K., Gerstner, G. R. & Ryan, E. D. The rate of velocity development  
548 associates with muscle echo intensity, but not muscle cross-sectional area in older men. *Aging*  
549 *Clin Exp Res* **30**, 861–865 (2018).
- 550 20. Nishihara, K. *et al.* Comparisons of muscle thicknesses, echo intensities, and motor  
551 functions between community-dwelling older Japanese adults with and without diabetes. *Arch*  
552 *Gerontol Geriatr* **97**, 104516 (2021).
- 553 21. Olmos, A. A. *et al.* Early and late rapid torque characteristics and select physiological  
554 correlates in middle-aged and older males. *PLoS ONE* **15**, e0231907 (2020).
- 555 22. Paris, M. T., Bell, K. E., Avrutin, E. & Mourtzakis, M. Association of strength, power, and  
556 function with muscle thickness, echo intensity, and lean tissue in older males. *Appl Physiol Nutr*  
557 *Metab* **47**, 521–528 (2022).
- 558 23. Wearing, J., Stokes, M. & De Bruin, E. D. Quadriceps muscle strength is a discriminant  
559 predictor of dependence in daily activities in nursing home residents. *PLoS ONE* **14**, e0223016  
560 (2019).
- 561 24. Wilson, D. V. *et al.* Bilateral anterior thigh thickness: A new diagnostic tool for the  
562 identification of low muscle mass? *J Am Med Dir Assoc* **20**, 1247-1253.e2 (2019).
- 563 25. Hopkins, W. G., Marshall, S. W., Batterham, A. M. & Hanin, J. Progressive statistics for  
564 studies in sports medicine and exercise science. *Med Sci Sports Exerc* **41**, 3–12 (2009).
- 565 26. Akagi, R. *et al.* Muscle size-strength relationship including ultrasonographic echo intensity  
566 and voluntary activation level of a muscle group. *Archives of Gerontology and Geriatrics* **75**,  
567 185–190 (2018).

- 568 27. Akazawa, N., Okawa, N., Tamura, K. & Moriyama, H. Relationships between  
569 intramuscular fat, muscle strength and gait independence in older women: A cross-sectional  
570 study. *Geriatrics Gerontology Int* **17**, 1683–1688 (2017).
- 571 28. Akima, H. *et al.* Quadriceps echo intensity can be an index of muscle size regardless of  
572 age in 65 or more years old. *Exp Gerontol* **138**, 111015 (2020).
- 573 29. Akima, H. *et al.* Relationship between quadriceps echo intensity and functional and  
574 morphological characteristics in older men and women. *Arch Gerontol Geriatr* **70**, 105–111  
575 (2017).
- 576 30. Bali, A. U. *et al.* Muscle strength, not age, explains unique variance in echo intensity. *Exp*  
577 *Gerontol* **139**, 111047 (2020).
- 578 31. Cadore, E. L. *et al.* Echo intensity is associated with skeletal muscle power and  
579 cardiovascular performance in elderly men. *Exp Gerontol* **47**, 473–478 (2012).
- 580 32. Chang, K.-V., Wu, W.-T., Huang, K.-C., Jan, W. H. & Han, D.-S. Limb muscle quality  
581 and quantity in elderly adults with dynapenia but not sarcopenia: An ultrasound imaging study.  
582 *Exp Gerontol* **108**, 54–61 (2018).
- 583 33. Chang, K.-V., Yang, K.-C., Wu, W.-T., Huang, K.-C. & Han, D.-S. Association between  
584 metabolic syndrome and limb muscle quantity and quality in older adults: A pilot ultrasound  
585 study. *Diabetes Metab Syndr Obes* **Volume 12**, 1821–1830 (2019).
- 586 34. Farrow, A. C. & Palmer, T. B. Age-related differences in hip flexion maximal and rapid  
587 strength and rectus femoris muscle size and composition. *J Appl Biomech* **37**, 311–319 (2021).
- 588 35. Fukumoto, Y. *et al.* Skeletal muscle quality assessed from echo intensity is associated with  
589 muscle strength of middle-aged and elderly persons. *Eur J Appl Physiol* **112**, 1519–1525 (2012).

- 590 36. Guadagnin, E. C., Priario, L. A. A., Carpes, F. P. & Vaz, M. A. Correlation between lower  
591 limb isometric strength and muscle structure with normal and challenged gait performance in  
592 older adults. *Gait Posture* **73**, 101–107 (2019).
- 593 37. Harris-Love, M. O. *et al.* Association between muscle strength and modeling estimates of  
594 muscle tissue heterogeneity in young and old adults. *J Ultrasound Med* **38**, 1757–1768 (2019).
- 595 38. Hill, M. W., Roberts, M., Price, M. J. & Kay, A. D. Association between knee extensor  
596 and ankle plantarflexor muscle thickness and echo intensity with postural sway, mobility and  
597 physical function in older adults. *Experimental Gerontology* **150**, 111385 (2021).
- 598 39. Hirata, K. *et al.* Muscle quality indices separately associate with joint-level power-related  
599 measures of the knee extensors in older males. *Eur J Appl Physiol* **122**, 2271–2281 (2022).
- 600 40. Komforti, D. *et al.* Does skeletal muscle morphology or functional performance better  
601 explain variance in fast gait speed in older adults? *Aging Clin Exp Res* **33**, 921–931 (2021).
- 602 41. Lopez, P. *et al.* Echo intensity independently predicts functionality in sedentary older men.  
603 *Muscle Nerve* **55**, 9–15 (2017).
- 604 42. Maddocks, M. *et al.* Ankle dorsiflexor muscle size, composition and force with ageing and  
605 chronic obstructive pulmonary disease. *Exp Physiol* **99**, 1078–1088 (2014).
- 606 43. Magrini, M. A. *et al.* Muscle size, strength, power, and echo intensity, but not specific  
607 tension, are affected by age in physically active adults. *Isokin Exerc Sci* **26**, 95–103 (2018).
- 608 44. Masaki, M. *et al.* Association of walking speed with sagittal spinal alignment, muscle  
609 thickness, and echo intensity of lumbar back muscles in middle-aged and elderly women. *Aging*  
610 *Clin Exp Res* **28**, 429–434 (2016).

- 611 45. Mateos-Angulo, A., Galán-Mercant, A. & Cuesta-Vargas, A. I. Muscle thickness and echo  
612 intensity by ultrasonography and cognitive and physical dimensions in older adults. *Diagnostics*  
613 **11**, 1471 (2021).
- 614 46. Mirón Mombiela, R., Facal De Castro, F., Moreno, P. & Borrás, C. Ultrasonic echo  
615 intensity as a new noninvasive in vivo biomarker of frailty. *J Am Geriatr Soc* **65**, 2685–2690  
616 (2017).
- 617 47. Nishihara, K. *et al.* Frequency analysis of ultrasonic echo intensities of the skeletal muscle  
618 in elderly and young individuals. *Clin Interv Aging* 1471 (2014) doi:10.2147/CIA.S67820.
- 619 48. Olmos, A. A. *et al.* Neuromuscular function of the plantar flexors and predictors of peak  
620 power in middle-aged and older males. *Exp Gerontol* **125**, 110677 (2019).
- 621 49. Osawa, Y. *et al.* Relationships of muscle echo intensity with walking ability and physical  
622 activity in the very old population. *J Aging Phys Act* **25**, 189–195 (2017).
- 623 50. Palmer, T. B., Farrow, A. C. & Palmer, B. M. Relationships between hamstring  
624 morphological characteristics and postural balance in elderly men. *J Musculoskelet Neuronal*  
625 *Interact* **20**, 88–93 (2020).
- 626 51. Palmer, T. B. & Farrow, A. C. Correcting for subcutaneous fat: Does it improve the  
627 correlation between vastus lateralis echo intensity and physical performance in older women?  
628 *Clin Physio Funct Imaging* **42**, 372–379 (2022).
- 629 52. Palmer, T. B. & Thompson, B. J. Influence of age on passive stiffness and size, quality,  
630 and strength characteristics. *Muscle Nerve* **55**, 305–315 (2017).
- 631 53. Rech, A. *et al.* Echo intensity is negatively associated with functional capacity in older  
632 women. *Age* **36**, 9708 (2014).

- 633 54. Stock, M. S. *et al.* Echo intensity versus muscle function correlations in older adults are  
634 influenced by subcutaneous fat thickness. *Ultrasound Med Biol* **44**, 1597–1605 (2018).
- 635 55. Taniguchi, M. *et al.* Increase in echo intensity and extracellular-to-intracellular water ratio  
636 is independently associated with muscle weakness in elderly women. *Eur J Appl Physiol* **117**,  
637 2001–2007 (2017).
- 638 56. Wilhelm, E. N. *et al.* Relationship between quadriceps femoris echo intensity, muscle  
639 power, and functional capacity of older men. *Age* **36**, 9625 (2014).
- 640 57. Yamada, M. *et al.* Differential characteristics of skeletal muscle in community-dwelling  
641 older adults. *J Am Med Dir Assoc* **18**, 807.e9-807.e16 (2017).
- 642 58. Yamaguchi, K. *et al.* Factors associated with masseter muscle quality assessed from  
643 ultrasonography in community-dwelling elderly individuals: A cross-sectional study. *Arch*  
644 *Gerontol Geriatr* **82**, 128–132 (2019).
- 645 59. Yoshiko, A., Beppu, M., Chosa, N. & Watanabe, K. Unique characteristics of quadriceps  
646 muscle morphology and function in older tennis players. *Aging Phys Act* 1–8 (2021)  
647 doi:10.1123/japa.2021-0074.
- 648 60. Yoshiko, A. *et al.* Muscle quality characteristics of muscles in the thigh, upper arm and  
649 lower back in elderly men and women. *Eur J Appl Physiol* **118**, 1385–1395 (2018).
- 650 61. Yoshiko, A. *et al.* Higher and lower muscle echo intensity in elderly individuals is  
651 distinguished by muscle size, physical performance and daily physical activity. *Ultrasound Med*  
652 *Biol* **45**, 2372–2380 (2019).
- 653 62. Yoshiko, A. *et al.* Chair sit-to-stand performance is associated with diagnostic features of  
654 sarcopenia in older men and women. *Arch Gerontol Geriatr* **96**, 104463 (2021).



- 655 63. Mirón Mombiela, R. *et al.* Quantitative muscle ultrasound as an imaging biomarker for  
656 frailty syndrome. *Skelet. Radiol.* **46**, 869 (2017).
- 657 64. Ahmadiyahangar, A. *et al.* The role of quadriceps muscle strength in the development of  
658 falls in the elderly people, a cross-sectional study. *Chiropr Man Therap* **26**, 31 (2018).
- 659 65. Newman, A. B. *et al.* Strength and muscle quality in a well-functioning cohort of older  
660 adults: The health, aging and body composition study. *J Am Geriatr Soc* **51**, 323–330 (2003).
- 661 66. Bourgeois, B. *et al.* Improved strength prediction combining clinically available measures  
662 of skeletal muscle mass and quality. *J Cachexia Sarcopenia Muscle* **10**, 84–94 (2019).
- 663 67. Reinders, I. *et al.* Muscle quality and myosteatosis: Novel associations with mortality risk:  
664 The Age, Gene/Environment Susceptibility (AGES)-Reykjavik study. *Am J Epidemiol* **183**, 53–  
665 60 (2016).
- 666 68. Perkisas, S. *et al.* Application of ultrasound for muscle assessment in sarcopenia: 2020  
667 SARCUS update. *Eur Geriatr Med* **12**, 45–59 (2021).
- 668 69. Bahat, G. *et al.* Cut-off points to identify sarcopenia according to European Working Group  
669 on Sarcopenia in Older People (EWGSOP) definition. *Clin Nutr* **35**, 1557–1563 (2016).
- 670 70. Beavers, K. M. *et al.* Associations between body composition and gait-speed decline:  
671 results from the Health, Aging, and Body Composition study. *Am J Clin Nutr* **97**, 552–560  
672 (2013).
- 673 71. Clark, D. J., Manini, T. M., Fielding, R. A. & Patten, C. Neuromuscular determinants of  
674 maximum walking speed in well-functioning older adults. *Exp Gerontol* **48**, 358–363 (2013).
- 675 72. Maffiuletti, N. A. *et al.* Rate of force development: physiological and methodological  
676 considerations. *Eur J Appl Physiol* **116**, 1091–1116 (2016).

- 677 73. Maffiuletti, N. A., Bizzini, M., Widler, K. & Munzinger, U. Asymmetry in quadriceps rate  
678 of force development as a functional outcome measure in TKA. *Clin Orthop Relat Res* **468**,  
679 191–198 (2010).
- 680 74. Varesco, G., Espeit, L., Feasson, L., Lapole, T. & Rozand, V. Rate of force development  
681 and rapid muscle activation characteristics of knee extensors in very old men. *Experimental*  
682 *Gerontology* **124**, 110640 (2019).
- 683 75. Oranchuk, D. J., Stock, M. S., Nelson, A. R., Storey, A. G. & Cronin, J. B. Variability of  
684 regional quadriceps echo intensity in active young men with and without subcutaneous fat  
685 correction. *Appl Physiol Nutr Metab* **45**, 745–752 (2020).
- 686
